1 Folate bioavailability in reconstructed skin models and effects of folate in  
2 a monolayer wound healing assay. Approaches on topic application.

3

4 Short title: Folate bioavailability and wound healing promotion

5

6 Dirk Dressler<sup>1\*</sup>¶, Martin Ulmann<sup>2</sup>, Gerd Wiesler<sup>2</sup>¶

7

8

9

10 <sup>1</sup>BioTeSys GmbH, Esslingen, Germany

11 <sup>2</sup>Aprofol AG, Appenzell, Switzerland

12

13

14 \*Corresponding author

15 E-mail: [d.dressler@biotesys.de](mailto:d.dressler@biotesys.de)

16

17 ¶¶These authors contributed equally to this work

18

19

## 20 **Abstract**

21 In chronic and degenerative diseases impacting the skin folates play an important metabolic  
22 role improving wound healing and reducing skin irritations. In contrast to systemic folate  
23 administration little is known on skin penetration of folates after topical application. Here the  
24 penetration of simple aqueous solutions of reduced folates have been investigated with in-  
25 vitro reconstructed skin models mimicking the barrier of native human skin. For up to 24 h,  
26 penetration of the epidermis by newly developed folate salts and formulations were  
27 investigated. Aqueous and lipophilic solutions of L-formyltetrahydrofolate and L-mefolate  
28 salts were able to penetrate the epidermis. Even more importantly, the skin model revealed  
29 the metabolic conversion of L-folate to L-methyltetrahydrofolate. Exemplarily the effects of  
30 these new folate salts have been tested on wound healing in a scratch assay with primary  
31 human keratinocytes. All folates applied were able to enhance wound healing compared to  
32 the control.

33 Bioavailability, metabolic conversion and physiologic effectiveness of new folate formulation  
34 have been shown successfully in in vitro applications providing evidence for the potent  
35 applicability of the new folates in preparations for topic application.

## 36 **Introduction**

37 The skin much more than other tissue of the body is exposed to detrimental environmental  
38 conditions. Sunlight, smoke or air pollution [1], microorganisms, and chemical challenges like  
39 household detergents amongst other influences challenge the health of the skin [2]. Besides  
40 the extrinsic factors the condition of the largest organ is affected by pure intrinsic aging  
41 regularly, enhanced by photo aging processes not only associated with reduced number of  
42 blood vessels, especially in the upper dermis [3]. Consequently, regenerative abilities of our  
43 first barrier skin increasingly are affected with age [3–5]. Additionally, wounds caused by

44 various incidents more or less traumatically inflict the barrier between the body and the  
45 surrounding. Due to the initial great regenerative potential of the skin a lot of the integrity  
46 losses are cured by proliferation and differentiation of the cellular elements of the skin [6, 7].  
47 Wound healing can be divided into several phases such as inflammation, proliferation, and  
48 remodeling and age-related changes in wound repair have been described in each of these  
49 phases [8–10]. The underlying mechanisms remain unclear. Skin keratinocytes from older  
50 donors have more limited replicative lifespan than keratinocytes obtained from younger  
51 individuals when placed in culture [11, 12]. Cell adhesion molecules of estrogen levels were  
52 identified as possible factors influencing impaired wound healing in elderly people [13–15].  
53 Not exclusively but with increasing importance in the aged there are also metabolic dietary  
54 factors that may affect skin conditions. Among the most important nutrients for human health  
55 the family of folates play a key role in human skin. “This importance is underscored by  
56 potential links between folate deficiency and psoriasis, vitiligo, exfoliative dermatitis, glossitis,  
57 and skin cancers.” [16].  
58 Besides the metabolic benefits of orally taken folates, it would be interesting to understand if  
59 folates can cross the skin and thus open up the path for an alternative route of entry  
60 simultaneously offering the possibility to apply folates directly to areas that have increased  
61 needs.  
62 The main drawbacks associated to folic acid use, particularly for topical applications, are the  
63 limited solubility and the sensitivity to UV rays [17]. The very low solubility of folic acid in  
64 aqueous physiological solutions (1.6 mg/L) [18] results in insufficient homogeneous  
65 dispersion in hydrophilic solvents. Therefore, surfactants, co-surfactants or co-solvents are  
66 required to employ a homogeneous formulation. The insolubility in organic solvents and the  
67 low lipophilicity hinders the penetration of the skin while applying penetration enhancers may  
68 impair the skin barrier.  
69 Folic acid is known as a food supplement for a long time. Folic acid is a synthetic form of the  
70 vitamin, which is only found in fortified foods, supplements and pharmaceuticals. It lacks

71 coenzyme activity and must be reduced to the metabolically active tetrahydrofolate form  
72 within the cell [19].  
73 Newly developed reduced folate-salts or folate formulation with improved solubility  
74 characteristics have been considered to investigate their ability to penetrate the skin in  
75 aqueous solution. These reduced folate salts (L-Formyltetrahydrofolate di arginine abbr.  
76 L-FTHF di arginine, L-Methyltetrahydrofolate di choline abbr. L-MTHF di choline) are more  
77 lipophilic, show good stability, are readily soluble in aqueous solutions, and are at least  
78 moderately soluble in organic media increasing the options for formulation for local  
79 applications. The solubility characteristics of L-Formyltetrahydrofolate Calcium (L-FTHF Ca,  
80 approx. 0.51 g/L in aqueous solutions) has been improved significantly in a new proprietary  
81 liquid formulation avoiding precipitation of the folate.  
82 The basic question motivating the current approach was the bioavailability of the new folate  
83 salts and possible differences in uptake efficiency between the different formulations. Based  
84 on these results the development of products for topical application might be considered. To  
85 address at least one of the fields of application for such products the effect of these specific  
86 folate salts on wound healing was evaluated on behalf of the scratch assay including primary  
87 skin keratinocytes.

88

## 89 **Material and Methods**

### 90 **Chemicals**

91 L-FTHF Ca (Fig 1; L-formylfolate calcium salt, 5-formyl-(6S)-tetrahydrofolic acid calcium salt)  
92 purchased from Cerbios SA, Switzerland; L-MTHF di choline (Fig 2; L-methylfolate di choline  
93 salt, 5-methyl-(6S)-tetrahydrofolic acid di choline salt) and L-FTHF di arginine (L-formylfolate  
94 di arginine salt, 5-formyl-(6S)-tetrahydrofolic acid di L-arginine salt) were synthesized by  
95 SynphaBase AG, Switzerland on behalf of Aprofol AG, Switzerland.

96

97

98 Fig. 1: Structure of L-FTHF di arginine

99

100 Fig 2: Structure of L-MTHF di choline

101

102 Solutions for the assays were prepared at room temperature without pH modification as  
103 follows: L-FTHF Ca 2.5% (w/w) and sodium gluconate 2.5% (w/w) in ultra pure water (MilliQ  
104 Reference A+, Merck, Darmstadt, Germany) corresponding to 48.69 mM L-FTHF. L-MTHF di  
105 choline 2.5% (w/w) in ultra-pure water corresponding to 37.55 mM L-MTHF. L-FTHF di  
106 arginine 2.5% (w/w) in ultra-pure water corresponding to 30.42 mM L-FTHF.

107

## 108 **Bioavailability**

109 Bioavailability of folates in skin, was evaluated on behalf of reconstructed skin models  
110 (epiCS, Henkel AG & Co. KGaA, Düsseldorf, Germany) generated from isolated primary  
111 human keratinocytes. These models show a barrier very similar to human skin and are an  
112 accepted model for skin irritation and skin corrosion tests (e.g. OECD TG 439).

113 The skin models are cultured on a porous membrane forming a two-compartment system  
114 separated by the human skin like barrier (0.6 cm<sup>2</sup>). The skin models are delivered  
115 accompanied with quality control data of the respective batch. Additionally, to determine the  
116 applicability of the skin models at the study site, the barrier was checked for leaks before use  
117 by means of trans epithelial electrical resistance measurements (TEER, EVOM with STX3  
118 electrodes, World Precision Instruments, USA). Models with a significantly below-average  
119 electrical resistance between the apical and the basal compartment were not used in the  
120 experiment. Suitable skin models were treated topically with 50 µL of the test product  
121 solutions prepared as described under “chemicals” without further dilution. The basal

122 compartment during treatment was filled with 1000 $\mu$ L HBSS (Hanks balanced salt solution  
123 Lonza, Switzerland) to omit influences of the complex and proprietary cell culture medium on  
124 later analyses. After 4h (data not shown), 8h and 24h, samples of the buffer (500  $\mu$ L of 1000  
125  $\mu$ L) were taken from the basal part below the models to check for the presence and  
126 concentration of folates. 500  $\mu$ L of fresh HBSS was added replacing the withdrawn volume at  
127 4h and 8h. Each test product and controls were tested at one concentration in three  
128 replicates. The study was repeated once to obtain results from two independent trials.  
129 The analysis of the buffer samples was carried out by way of a LC/MS method established  
130 by the University of Saarland, Germany [20].

131 Subsequently to the topical treatment for 24h the skin models were washed and incubated  
132 with a vital dye (Resazurin, MerckMillipore, Darmstadt, Germany) to determine the relative  
133 number of living cells in the models. After 2h incubation samples of the basal medium were  
134 analyzed on Resarufin the redox product of Resazurin formed by vital cells by measuring the  
135 fluorescence at 560/590 nm on a fluorescence reader (Infinite M200 pro Tecan, Austria).

136

## 137 **Scratch Assay**

138 To exemplarily examine the effect of different reduced folate preparations on wound healing  
139 the in vitro Scratch Assay was employed. This in vitro model comprises the defined injuring  
140 of a closed cell layer and the subsequent recovery of the defect in the presence of the test-  
141 substance compared to appropriate controls, i.e. (untreated) cells with no test-substance  
142 present.

143 The experimental procedure for the Scratch Assay was as follows: Primary keratinocytes of  
144 human skin (C-12005, Promocell, Heidelberg, Germany) were cultured in the medium  
145 recommended by the manufacturer (C-20011, Promocell, Heidelberg, Germany). A dose  
146 finding experiment was conducted prior to the scratch assay. Keratinocytes were seeded on  
147 96-well plates cultured to confluence and incubated with five dilutions of the folate solutions

148 for 24 h. MTT (methylthiazolyldiphenyl-tetrazoliumbromid, 0.5 mg/mL M2128, Merck,  
149 Darmstadt) was added for 2h and the color change caused by the conversion of the vital dye  
150 in living cells was quantified photometrically.

151 Three different non-toxic dosages were applied in the scratch assay. Keratinocytes were  
152 cultivated in appropriate cell culture plates (6-well plates , Greiner BioOne, Frickenhausen,  
153 Germany) bearing position markings on the outer bottom of each well. Cells were grown until  
154 they completely cover the growth area. Cells were scratched with a pipette tip along the  
155 position markings, generating an area free of cells (scratch, injury). The cultures were  
156 washed to remove partially detached cells and were covered with medium comprising the  
157 test-substances in appropriate dosages. Regrowth of the cells into the cell free area was  
158 photographically documented at 0h, 6h, and 24h. Analysis was done by marking and  
159 calculating the cell-free area on behalf of a software (ImageJ [21]) on the image files taken at  
160 the given points in time. The relative closure of the wound-area was calculated by subtracting  
161 the relative wound area at each time point from the initial wound area (=100%). For every  
162 dosage of each test substance two replicates were treated in a single experiment. The not  
163 supplemented standard medium and standard medium supplemented with 10 % fetal bovine  
164 serum (FBS, Biochrome, Berlin, Germany) served as control.

165

## 166 **Results**

167 The bioavailability of L-MTHF or L-FTHF from the preparations was demonstrated after  
168 supplementation of reconstructed skin models. Buffer samples of the basolateral  
169 compartment of the models were analyzed for folic acid, L-MTHF (L-methylfolate), and L-  
170 FTHF (L-formylfolate) in order to detect the penetration and metabolism of the different folate  
171 salts.

172 After 8 h low folic acid concentrations were found partially differing significantly between  
173 control models and supplemented models. L-MTHF and L-FTHF were found in much higher

174 concentrations. After supplementation, the topically applied folate derivatives penetrated  
175 through the epithelium of the skin models and partially were metabolized by the cells of the  
176 skin models. The main part of the topically applied L-FTHF passed through the tissue but  
177 was also partially metabolized to L-MTHF (Fig 3, and 4). Conversely, the topically applied  
178 L-MTHF as such got through the tissue of the skin models obviously without being  
179 metabolized.

180

181 **Fig 3: Penetration of folates through reconstructed human skin models.**

182 Determination of folic acid, L-MTHF and L-FTHF concentrations in the compartments under the skin  
183 models after 8h. Skin models were topically treated with the compounds indicated. Mean of two  
184 experiments each with N=3 + SEM. Statistics: ONE-way ANOVA with Tukeys multicomparison test  
185 (Prism 5.04 GraphPad Software, San Diego, USA) ( $p < 0.05 = *$ ;  $p < 0.01 = **$ ;  $p < 0.001 = ***$ ).  
186 Differences to the control are only partially depicted.

187

188 After 24h (Fig 4) both the folic acid (partially) and L-MTHF concentrations are higher than  
189 after 8h. The folic acid concentrations below the skin models treated with L-FTHF Ca are  
190 twice as high as the concentrations of the other skin models. However, the folic acid  
191 concentration is negligible in comparison to L-MTHF and L-FTHF concentrations measured  
192 (refer to the molar range). The differences in the level of L-MTHF between L-FTHF Ca and L-  
193 FTHF di arginine supplemented on the one hand and L-MTHF di choline supplemented skin  
194 models were highly significant (Figs 3 and 4). The concentration of L-MTHF in skin models  
195 treated with L-FTHF Ca also are relatively high (1118 nmol/L). The concentration of the  
196 solution below the models treated with L-FTHF di arginine is approximately half that (620  
197 nmol/L). L-FTHF cannot be detected in the samples after L-MTHF di choline since L-FTHF  
198 cannot be formed from L-MTHF by human cells or only through energy-consuming metabolic  
199 pathways (Figs 3 and 4). On the other hand, L-FTHF is measurable in all other samples with  
200 the exception of the control.



201

202 **Fig 4: Penetration of folates through reconstructed human skin models (24h)**

203 Determination of folic acid L-MTHF and L-FTHF concentrations in the compartment under the skin  
204 models after 24h. Skin models were topically treated with the compounds mentioned on the x-axis.  
205 N=3 + SEM. Statistics: ONE-way ANOVA with Tukeys multicomparison test (Prism 5.04 GraphPad  
206 Software, San Diego, USA) ( $p < 0.05 = *$ ;  $p < 0.01 = **$ ;  $p < 0.001 = ***$ ) Differences to the control are  
207 only partially depicted.

208

209 Since the integrity of the skin like barrier is important to prevent leakage of topically applied  
210 supplements to the basolateral acceptance compartment, we examined the vitality of the skin  
211 models after each experiment besides the electrical resistance controlled prior to the  
212 application of the supplements (data not shown). The viability of the skin models was not  
213 adversely affected by the treatment (Fig 5). A slight decrease in vitality following treatment  
214 with the L-MTHF di choline was observed (86% of the control). However, a decline of this  
215 magnitude is not considered being a toxic effect.

216

217 **Fig 5: Survival of reconstructed human skin models.**

218 Relative vitality of the cells of the skin models after 24h topical treatment with 50  $\mu$ L of each of the test  
219 substances or water. The fluorescence values of the dye (resazurin) is corresponding to the number of  
220 living cells and was normalized to the control (= 100%). Mean of two experiments each with N = 3 +  
221 SEM.

222

223 In preparation to the scratch assay, applicable concentrations were evaluated by applying  
224 five different concentrations of the test chemicals to confluent monolayers of primary  
225 keratinocytes as described under methods. Concentrations resulting in relative vitalities of  
226 more than 70% compared to the control qualify for the scratch assay.

227 The results for the dose finding are depicted in Fig 6. Based on these results the highest of  
228 the three concentrations chosen for the scratch assay were 1.5 mM for L-MTHF di choline,  
229 1.95 mM for L-FTHF Ca and 1.22 mM for L-FTHF di arginine. These concentrations were  
230 supported by additional calculations (Hill-slope, GraphPad Prism 5.04, data not shown).

231

232 **Fig 6: Determination of the applicable dosage of the test products.**

233 Cytotoxicity test with keratinocytes in monolayer culture after conversion of the vital dye MTT by living  
234 cells. The concentration data are based on solutions as mentioned in chemicals. Treatment time =  
235 24h. Untreated cultures served as negative control. N = 6 + SEM.

236 Following the procedure described under methods, onto confluent monolayers of primary  
237 keratinocytes, a wound was applied and the three different concentrations of the test  
238 chemicals were added to separate cultures. Other keratinocyte cultures were treated with  
239 medium only or medium with 10% FBS accordingly and served as controls.

240 After 6 hours, no substantial coverage of the cell-free area has been achieved in all  
241 treatment groups. Only 12 to 24% of the initial area were recovered. After 24 h, 50 to 77% of  
242 the initial wound area was covered. At that time the folic acid solutions in tendency better  
243 promote growth than the standard medium (Figs 7). The folate solutions promote growth in a  
244 similar manner (60 -77% recovery). No clear dose dependency was detected with L-FTHF di  
245 arginine. No statistics have been calculated due to the low number of replicates.

246 Supplementation with various folate preparations in tendency led to accelerated regeneration  
247 of an artificial wound after 24h in the scratch assay.

248

249 **Fig 7: Scratch assay, recovery of wound area.**

250 Area of the wounds covered after 6h or 24h. The measured areas were expressed as % of the starting  
251 area of the respective treatment group. The higher the bars, the more the wound "healed". For each  
252 treatment group, three concentrations were investigated in two separate cultures (N=2) +SEM.

253

254 **Fig 8-10: Scratch assay, examples of progression of wound healing.**

255 Example of the recordings for L-MTHF di choline 48.9 nmol/mL from left to right 0h, 6h and 24h. The  
256 white lines delimit the wound areas for measurement. The black bars mark 100  $\mu$ m stretch.

257 After 6h only little surface recovered. After 24h it becomes difficult to mark a cell-free area.

258 The initial wound area is almost covered.

259

## 260 **Discussion**

261 Hasoun et al [22] found low folate concentrations in human epidermis compared with many  
262 other tissues. At the same time they identified a relatively high proportion of L-MTHF in  
263 healthy epidermis compared to the dermis. They discuss a special role for L-MTHF in the  
264 epidermis with respect to possible photo degradation and maintenance of the high  
265 proliferation rate typical for the epidermis. In general these findings indicate special  
266 requirements of the epidermis regarding folates.

267 In the current in vitro study, the bioavailability of newly developed folate salts was  
268 demonstrated in reconstructed skin models. This is the first time that penetration of skin  
269 models has been shown with simple aqueous solutions of folates free of any allergenic or  
270 irritating substances. Most impressing, the supplemented L-FTHF was partially metabolized  
271 to L-MTHF the dominant form in the body and the cellular part of the skin. The occurrence of  
272 metabolites of the supplemented salts on the one hand underline the accessibility of the  
273 folates for human skin cells despite distinct horny layer. On the other hand those findings  
274 highlight the physiologic capacity of in vitro reconstructed skin models which largely rebuild  
275 the barrier function of human skin.

276 At both times examined we found similar but low concentrations of folic acid opposite to the  
277 treatment side in the basal compartment (Figs 3 and 4). With no other source of folates

278 present than the supplements. We assumed that folic acid values determined with the  
279 tissues mainly still originated from folic acid residues fed with the culture medium during  
280 maturation of the tissue and now gradually released or leaking from the cells. This  
281 interpretation is quite likely for the control tissue that received no supplement. However, the  
282 values measured with tissues supplemented with L-FTHF-Ca were significantly different to  
283 values measured with the control tissue or tissues supplemented with L-MTHF di choline  
284 strongly indicating a possible additional trigger by the treatment. If this finding is caused by  
285 lower consumption of folic acid remnants due to a now available second source of folates  
286 remains unclear.

287 L-MTHF was found in high levels opposite from the supplemented side of the skin models.  
288 The highest concentrations understandably were found after supplementation with L-MTHF  
289 di choline that seemed to penetrate easily through the keratinized layer and the cell layers  
290 below. Remarkably, models supplemented with L-FTHF Ca (155 nmol/L after 8h, 1118  
291 nmol/L after 24h) and L-FTHF di arginine (76 nmol/L after 8h, 620 nmol/L after 24h) also  
292 showed quite high concentrations of L-MTHF but significantly lower concentrations than after  
293 L-MTHF di choline treatment. Obviously, L-MTHF was formed from these two derivatives by  
294 cellular metabolism. After 8h and even more after 24h the concentrations of L-MTHF of the  
295 L-FTHF-Ca treated skin were twice as high as after L-FTHF di arginine treatment. However,  
296 it must be taken into account that molarities applied of the two supplements differ by about  
297 one third (L-FTHF-Ca = 48.69 mM; L-FTHF di arginine = 30.42 mM) which contributes to a  
298 large part of the difference. The analysis of L-FTHF shows a more simple picture. Since L-  
299 MTHF supplemented via L-MTHF di choline can not be metabolized to L-FTHF only L-MTHF  
300 has been detected below these skin models. Significantly more L-FTHF was found after  
301 supplementation with L-FTHF-Ca than after supplementation with L-FTHF di arginine. As  
302 mentioned above this difference to a large part might be caused by different molarities  
303 supplemented with these two solutions (see above). After 24h the difference between the  
304 supplementation groups were below significant levels. Moreover, the difference of the initially

305 applied molarities no longer are reflected. While after 8h the penetration of L-FTHF-Ca  
306 seems to be slightly better, after 24h treatment the contrary becomes evident.

307 The viability of the models was not significantly affected by the treatment. It therefore could  
308 be assumed that the barrier function of the skin models was not impaired. Compared to the  
309 test on irritating effects according to OECD TG 439 [23], where models are treated with the  
310 test substances for only 15 minutes, treatment over 24 hours is far more challenging. Thus,  
311 for the tested folates a very good compatibility to the human skin can be stated.

312 In the current approach, penetration of folates through the epidermis has been addressed  
313 and metabolic conversion was detected as a side effect. Since the reconstructed skin tissue  
314 models as such were not examined on folate content it is unknown if and to what extend the  
315 folates are retained in the reconstructed skin tissue. Moreover, it is not clear which specific  
316 cell layer of the model is responsible for the metabolic conversion of folates. Future  
317 approaches might engage more into the processes within the tissue even integrating dermal  
318 elements making use of full thickness skin models.

319 Humans are not able to synthesize folate de novo, and therefore are dependent upon dietary  
320 sources. The terms folate and vitamin B9 refer to a large family of chemically similar  
321 compounds different in the glutamine residue, one-carbon substituent position at N5 and N10  
322 or the oxidation state. The most widely known folate is the synthetic folic acid due to its  
323 enhanced chemical stability [24]. Folic acid is inactive in the body and needs to be converted  
324 to reduced folate by several enzymes e.g. in a rate limiting step by dihydrofolate reductase  
325 [19, 25, 26]. In further reducing steps dihydrofolate and dietary folates, as monoglutamates,  
326 are converted to the bioactive folate form in the body, e.g. L-MTHF. The folate uptake and  
327 metabolism is depending on many genetic polymorphisms affecting the status of folate and  
328 vitamin B12 resulting in elevated homocysteine [27, 28]. While folate deficiency has been  
329 extensively documented by analysis of human plasma, folate status within skin has not been  
330 widely investigated. However, inefficient delivery of micronutrients to skin and photolysis of  
331 folates argue that folate deficiencies will be present if not exacerbated in skin [24]. Therefore,

332 a targeted delivery of micronutrients might be of future interest to circumvent or support  
333 systemic impairments. The characteristics of the selected reduced folates as determined  
334 here supports their applicability with this respect.

335 In addition to the uptake studies aqueous solutions of the selected reduced folates  
336 exemplarily showed positive tendencies on wound healing in the scratch assay. This  
337 indication of an effect of the tested compounds in wound healing provides hints on a possible  
338 field of application improving the integrity of deficient epidermal barrier [22].

339 Since metabolization of folates as reported for the reconstructed skin models was not  
340 examined with the cells in the more basic monolayer model applied for wound healing there  
341 still is a lack of information on specific metabolites involved in the observed effects. Whether  
342 or not non-differentiated skin keratinocytes in monolayer culture are able to transform folates  
343 in a similar manner as highly differentiated keratinocytes in skin models has to be addressed  
344 in future work. Results obtained from such trials might help to understand which folates are  
345 best choice to promote wound healing or skin related diseases.

346

## 347 **Conclusion**

348 In the skin model simple aqueous solutions of reduced folates have overcome successfully  
349 the intact barrier of the skin models. Most impressingly the supplemented L-FTHF (L-  
350 formyltetrahydrofolate) was partially metabolized in the skin models to L-MTHF (L-  
351 methyltetrahydrofolate) the dominant form in the body and the cellular part of the skin  
352 models. The occurrence of metabolites of the added folate salts underline the accessibility  
353 for human skin cells. In addition, the scratch assay in primary keratinocytes remarkably  
354 demonstrated positive effects on wound healing. In individuals with disease-related low folate  
355 a topical folate application may help to improve skin conditions. The dermal penetration  
356 capabilities of reduced folates tested, free of any allergenic or irritating substances, open  
357 new possibilities for development of topical applications for local delivery of folate.

## 358 References

- 359 1. Schikowski T, Hüls A. Air Pollution and Skin Aging. *Curr Environ Health Rep.* 2020;7:58–  
360 64. doi:10.1007/s40572-020-00262-9.
- 361 2. Parrado C, Mercado-Saenz S, Perez-Davo A, Gilaberte Y, Gonzalez S, Juarranz A.  
362 Environmental Stressors on Skin Aging. Mechanistic Insights. *Front Pharmacol.*  
363 2019;10:759. doi:10.3389/fphar.2019.00759.
- 364 3. Rittié L, Fisher GJ. Natural and sun-induced aging of human skin. *Cold Spring Harb*  
365 *Perspect Med.* 2015;5:a015370. doi:10.1101/cshperspect.a015370.
- 366 4. Blair MJ, Jones JD, Woessner AE, Quinn KP. Skin Structure-Function Relationships and  
367 the Wound Healing Response to Intrinsic Aging. *Adv Wound Care (New Rochelle).*  
368 2020;9:127–43. doi:10.1089/wound.2019.1021.
- 369 5. Bonté F, Girard D, Archambault J-C, Desmoulière A. Skin Changes During Ageing.  
370 *Subcell Biochem.* 2019;91:249–80. doi:10.1007/978-981-13-3681-2\_10.
- 371 6. Pazyar N, Yaghoobi R, Rafiee E, Mehrabian A, Feily A. Skin wound healing and  
372 phytomedicine: a review. *Skin Pharmacol Physiol.* 2014;27:303–10.  
373 doi:10.1159/000357477.
- 374 7. Takeo M, Lee W, Ito M. Wound healing and skin regeneration. *Cold Spring Harb*  
375 *Perspect Med.* 2015;5:a023267. doi:10.1101/cshperspect.a023267.
- 376 8. Gosain A, DiPietro LA. Aging and wound healing. *World J Surg.* 2004;28:321–6.  
377 doi:10.1007/s00268-003-7397-6.
- 378 9. Gerstein AD, Phillips TJ, Rogers GS, Gilchrest BA. Wound healing and aging. *Dermatol*  
379 *Clin.* 1993;11:749–57.
- 380 10. Sgonc R, Gruber J. Age-related aspects of cutaneous wound healing: a mini-review.  
381 *Gerontology.* 2013;59:159–64. doi:10.1159/000342344.
- 382 11. Lecardonnel J, Deshayes N, Genty G, Parent N, Bernard BA, Rathman-Josserand M,  
383 Paris M. Ageing and colony-forming efficiency of human hair follicle keratinocytes. *Exp*  
384 *Dermatol.* 2013;22:604–6. doi:10.1111/exd.12204.
- 385 12. Barrandon Y, Green H. Three clonal types of keratinocyte with different capacities for  
386 multiplication. *Proc. Natl. Acad. Sci. U. S. A.* 1987;84:2302–6.  
387 doi:10.1073/pnas.84.8.2302.
- 388 13. Ashcroft GS, Horan MA, Ferguson MW. Aging alters the inflammatory and endothelial  
389 cell adhesion molecule profiles during human cutaneous wound healing. *Lab Invest.*  
390 1998;78:47–58.
- 391 14. Ashcroft GS, Ashworth JJ. Potential role of estrogens in wound healing. *Am J Clin*  
392 *Dermatol.* 2003;4:737–43. doi:10.2165/00128071-200304110-00002.
- 393 15. Wilkinson HN, Hardman MJ. The role of estrogen in cutaneous ageing and repair.  
394 *Maturitas.* 2017;103:60–4. doi:10.1016/j.maturitas.2017.06.026.
- 395 16. Watson RR, Zibadi S, Preedy VR. *Dietary Components and Immune Function.* Totowa,  
396 NJ: Springer Science+Business Media LLC; 2010.
- 397 17. Pagano C, Perioli L, Latterini L, Nocchetti M, Ceccarini MR, Marani M, et al. Folic acid-  
398 layered double hydroxides hybrids in skin formulations: Technological, photochemical  
399 and in vitro cytotoxicity on human keratinocytes and fibroblasts. *Applied Clay Science.*  
400 2019;168:382–95. doi:10.1016/j.clay.2018.12.009.
- 401 18. Hofsäss MA, Souza J de, Silva-Barcellos NM, Bellavinha KR, Abrahamsson B,  
402 Cristofolletti R, et al. Biowaiver Monographs for Immediate-Release Solid Oral Dosage  
403 Forms: Folic Acid. *J Pharm Sci.* 2017;106:3421–30. doi:10.1016/j.xphs.2017.08.007.
- 404 19. Pietrzik K, Bailey L, Shane B. Folic acid and L-5-methyltetrahydrofolate: comparison of  
405 clinical pharmacokinetics and pharmacodynamics. *Clin. Pharmacokinet.* 2010;49:535–  
406 48.



- 407 20. Kirsch SH, Knapp J-P, Herrmann W, Obeid R. Quantification of key folate forms in serum  
408 using stable-isotope dilution ultra performance liquid chromatography-tandem mass  
409 spectrometry. *J Chromatogr B Analyt Technol Biomed Life Sci.* 2010;878:68–75.  
410 doi:10.1016/j.jchromb.2009.11.021.
- 411 21. Schneider CA, Rasband WS, Eliceiri KW. NIH Image to ImageJ: 25 years of image  
412 analysis. *Nat. Methods.* 2012;9:671–5.
- 413 22. Hasoun LZ, Bailey SW, Outlaw KK, Ayling JE. Effect of serum folate status on total folate  
414 and 5-methyltetrahydrofolate in human skin. *Am J Clin Nutr.* 2013;98:42–8.  
415 doi:10.3945/ajcn.112.057562.
- 416 23. Organisation for Economic Co-operation and Development. Test No. 439: In Vitro Skin  
417 Irritation: Reconstructed Human Epidermis Test Method. Paris: OECD Publishing; 2015.
- 418 24. Williams JD, Jacobson EL, Kim H, Kim M, Jacobson MK. Folate in skin cancer  
419 prevention. *Subcell Biochem.* 2012;56:181–97. doi:10.1007/978-94-007-2199-9\_10.
- 420 25. Bailey SW, Ayling JE. The extremely slow and variable activity of dihydrofolate reductase  
421 in human liver and its implications for high folic acid intake. *Proc Natl Acad Sci U S A.*  
422 2009;106:15424–9. doi:10.1073/pnas.0902072106.
- 423 26. Selhub J, Rosenberg IH. Excessive folic acid intake and relation to adverse health  
424 outcome. *Biochimie.* 2016;126:71–8. doi:10.1016/j.biochi.2016.04.010.
- 425 27. Hiraoka M, Kagawa Y. Genetic polymorphisms and folate status. *Congenit Anom*  
426 (Kyoto). 2017;57:142–9. doi:10.1111/cga.12232.
- 427 28. Froese DS, Huemer M, Suormala T, Burda P, Coelho D, Guéant J-L, et al. Mutation  
428 Update and Review of Severe Methylenetetrahydrofolate Reductase Deficiency. *Hum*  
429 *Mutat.* 2016;37:427–38. doi:10.1002/humu.22970.



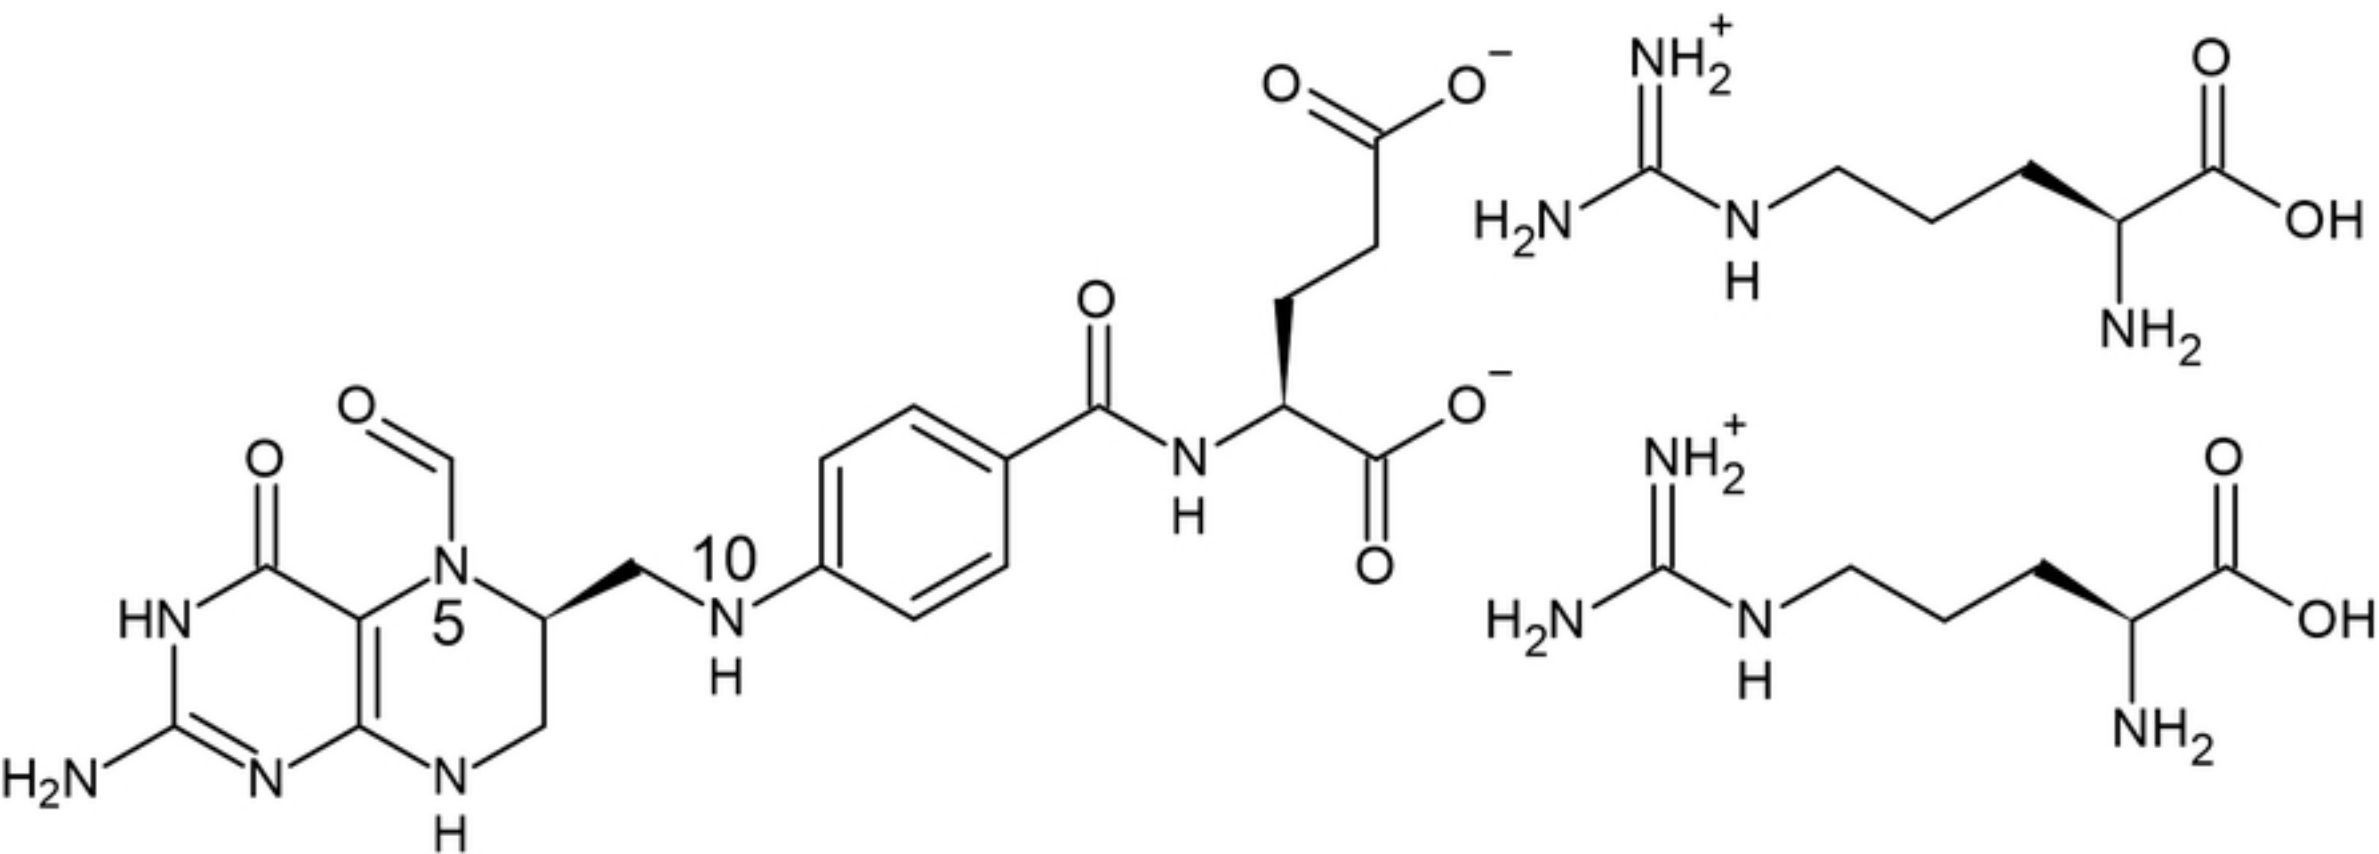

Figure 1

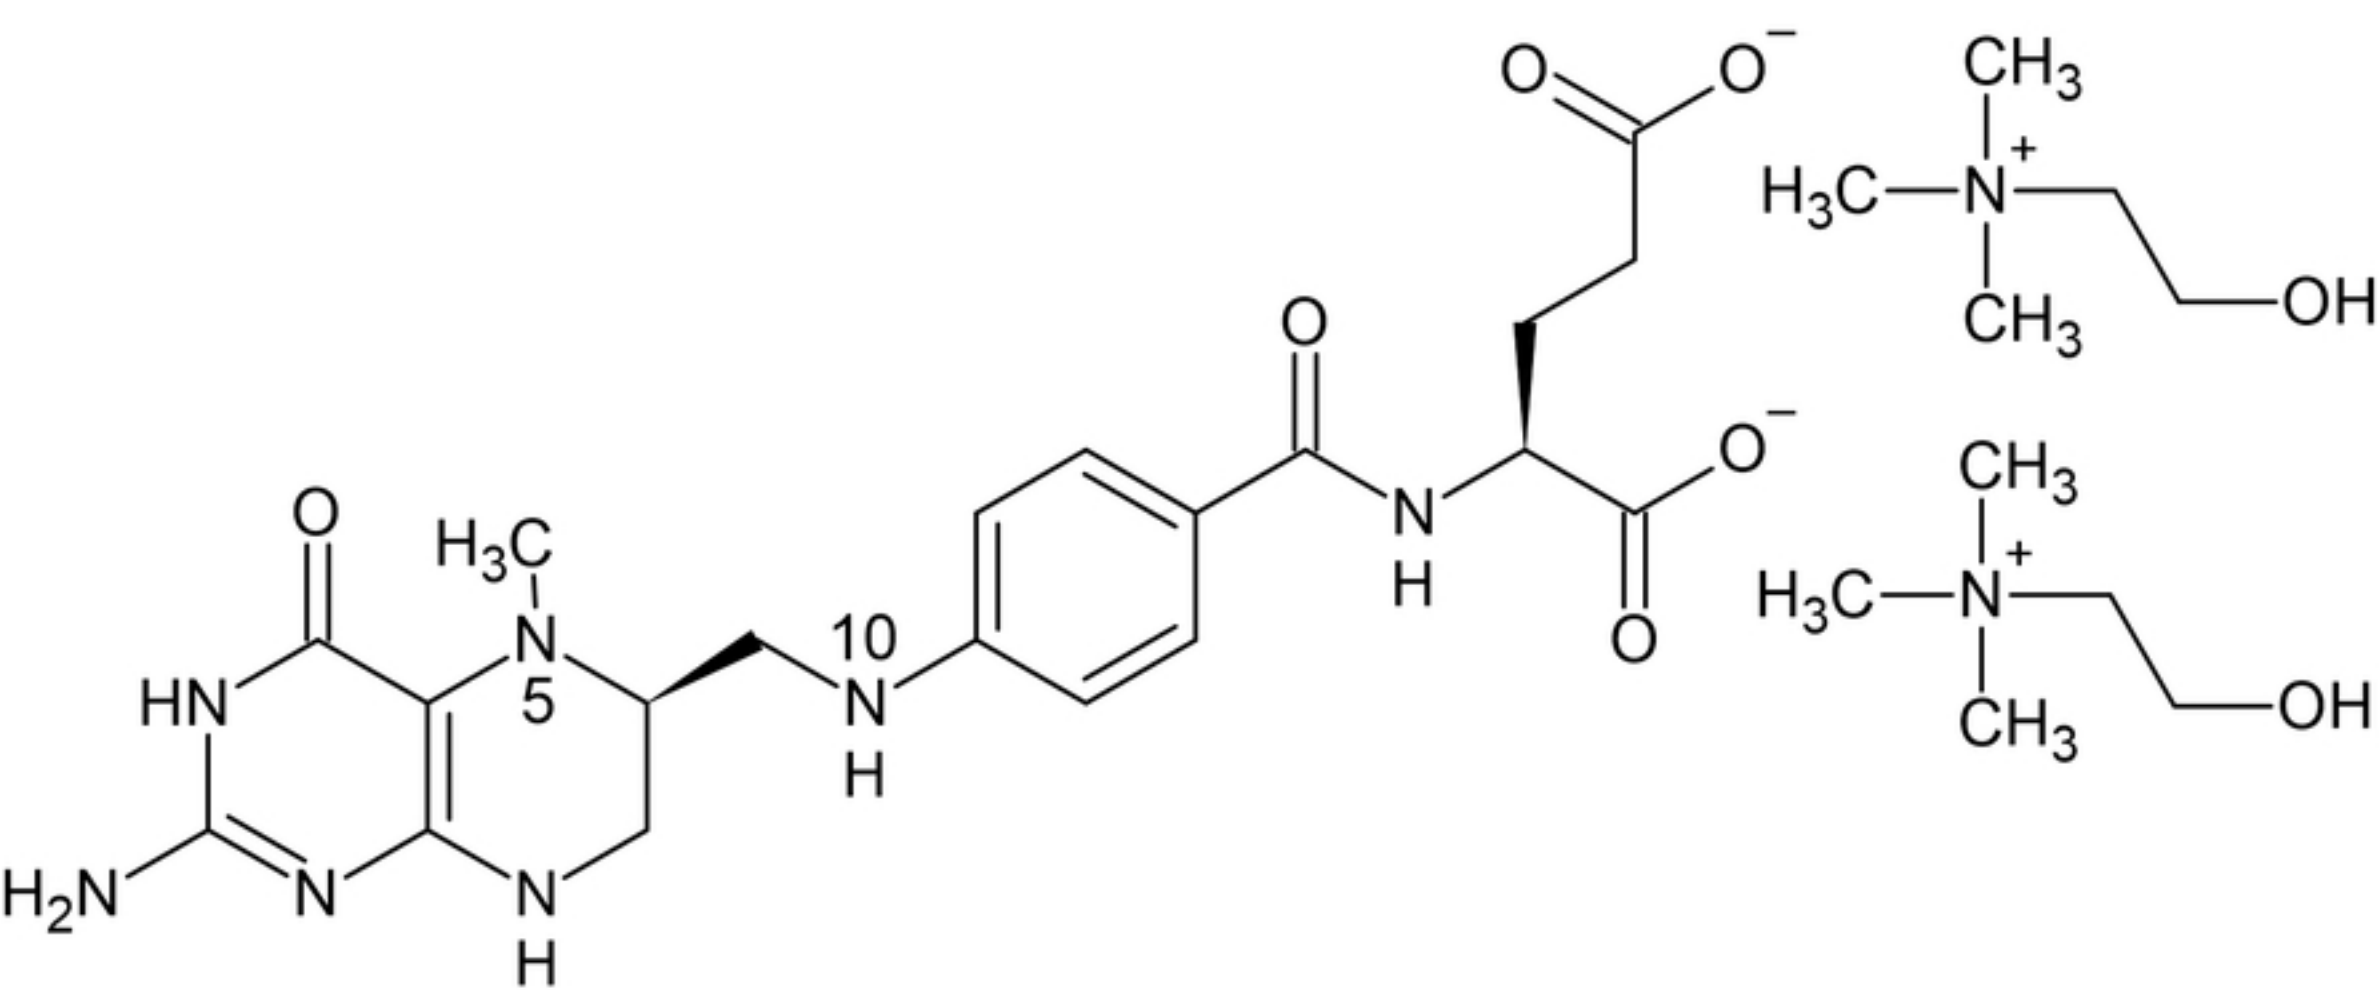

Figure2

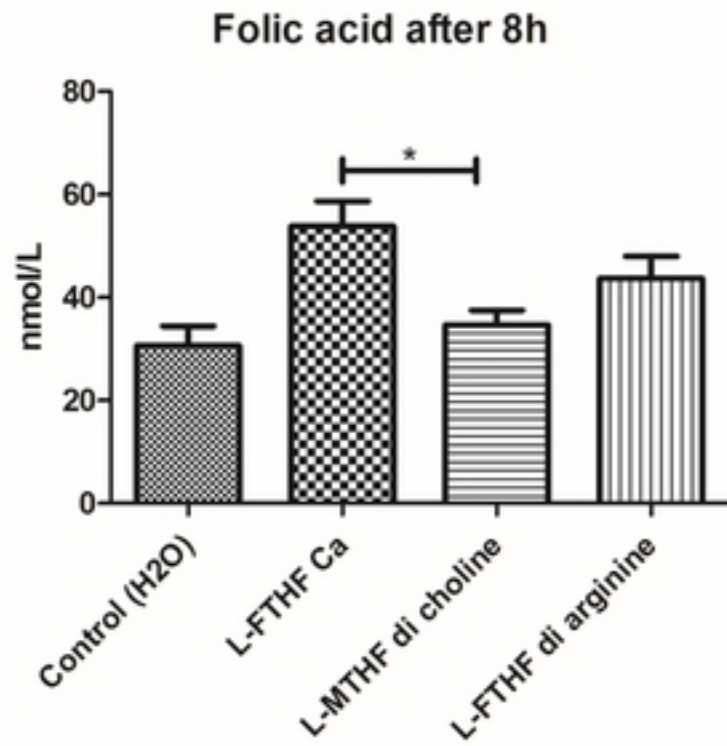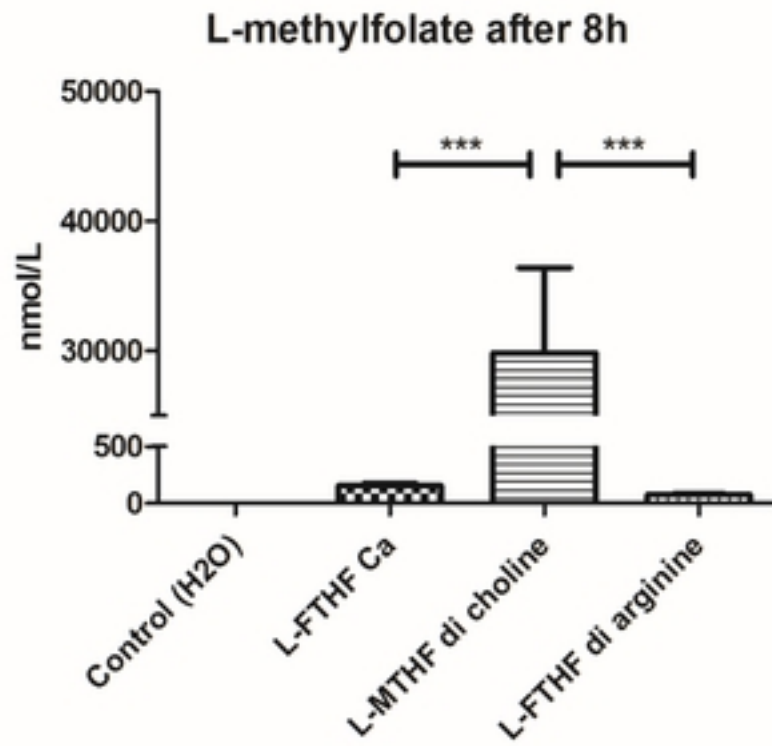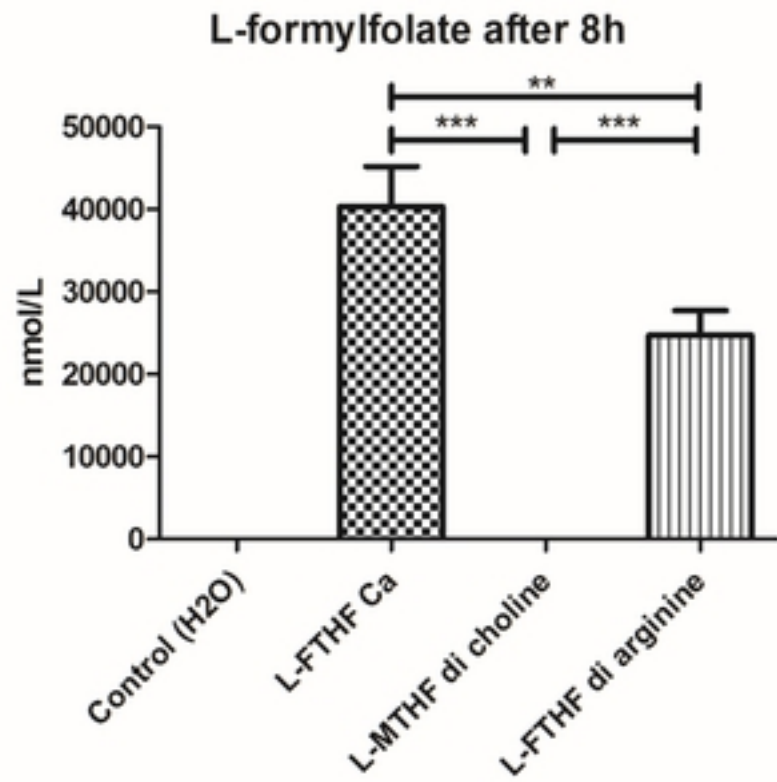

Figure3

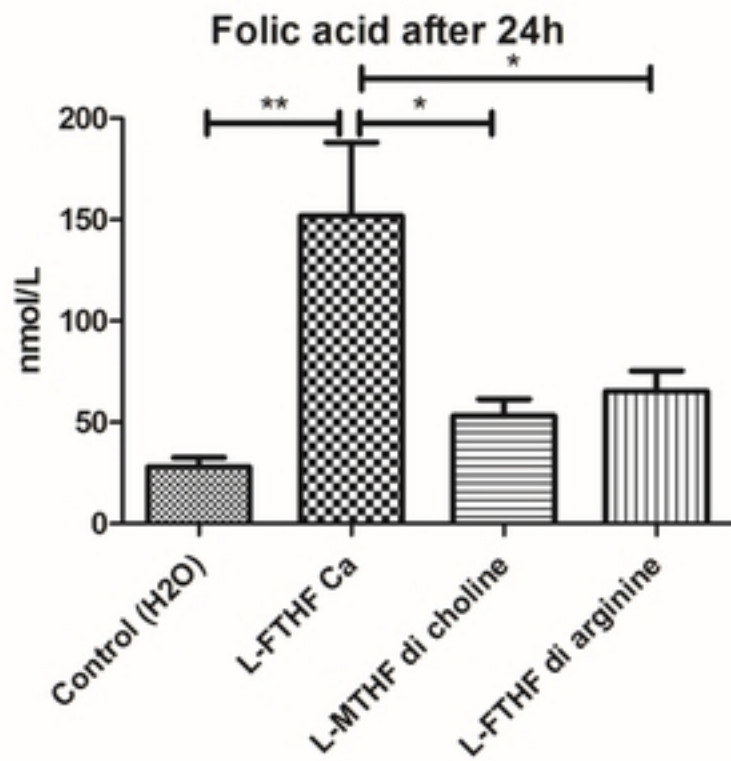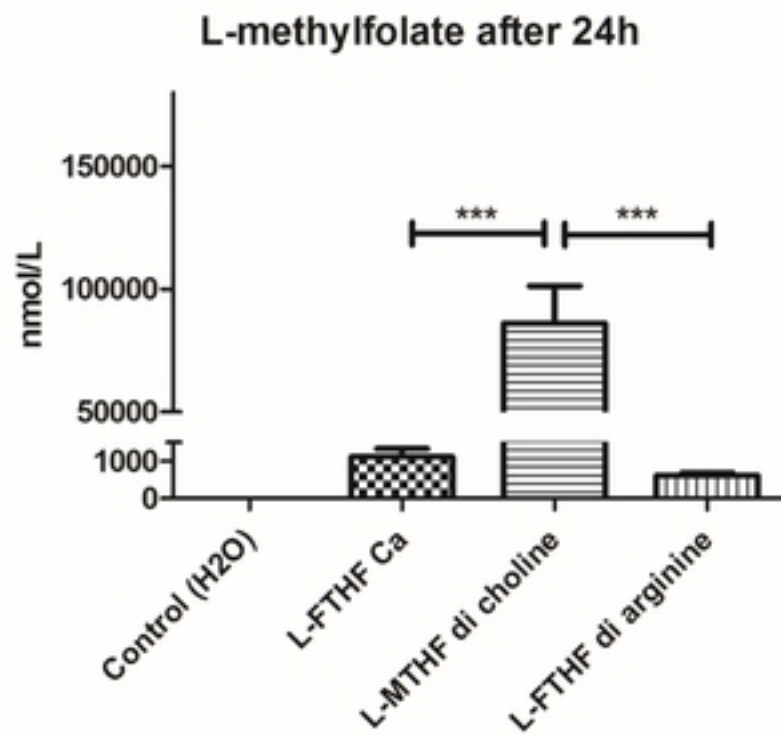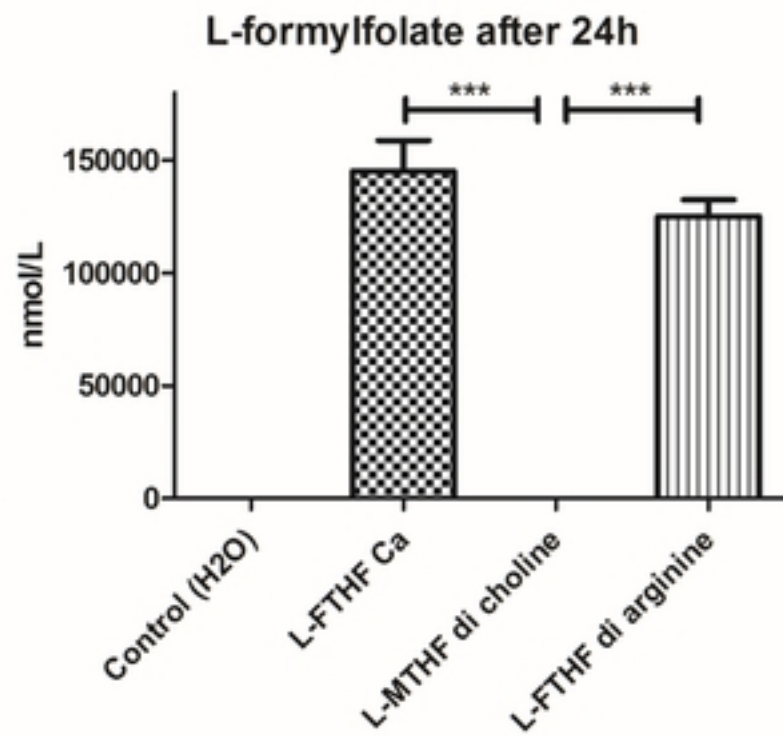

Figure 4

# Vitality of skin models after treatment mean of two experiments

bioRxiv preprint doi: <https://doi.org/10.1101/2021.04.07.438798>; this version posted April 7, 2021. The copyright holder for this preprint (which was not certified by peer review) is the author/funder, who has granted bioRxiv a license to display the preprint in perpetuity. It is made available under aCC-BY 4.0 International license.

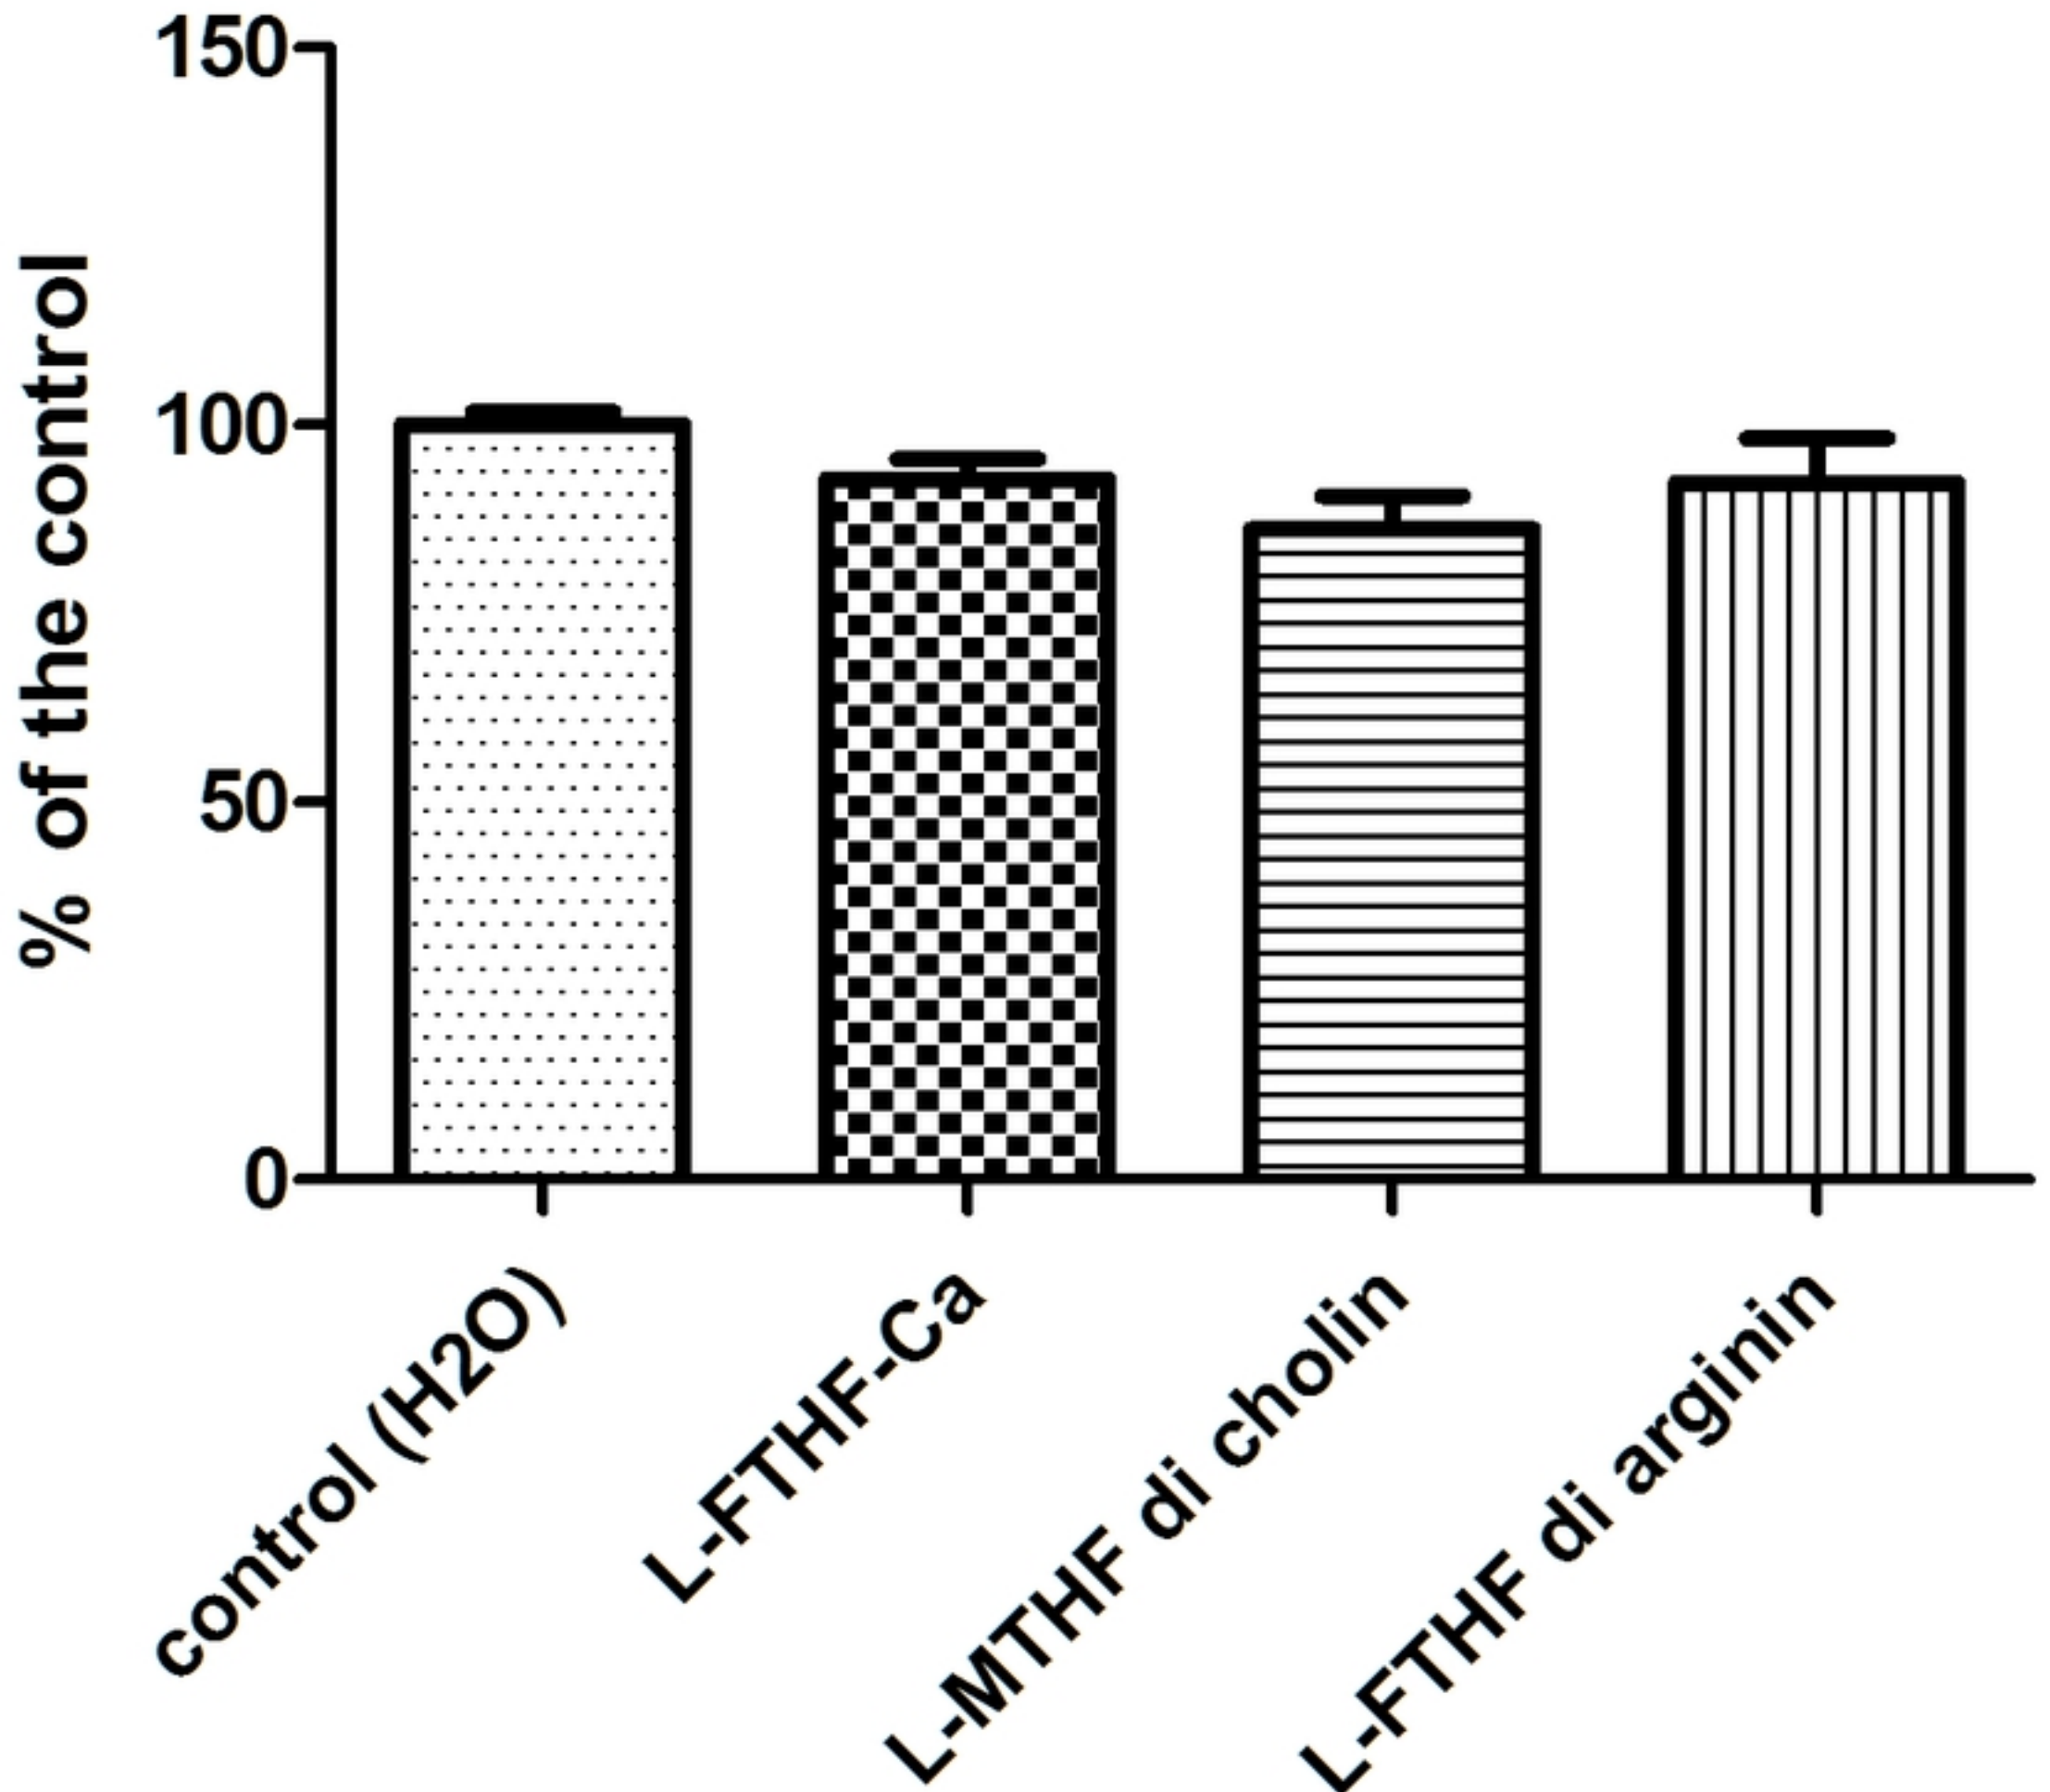

Figure5

L-FTHF Ca

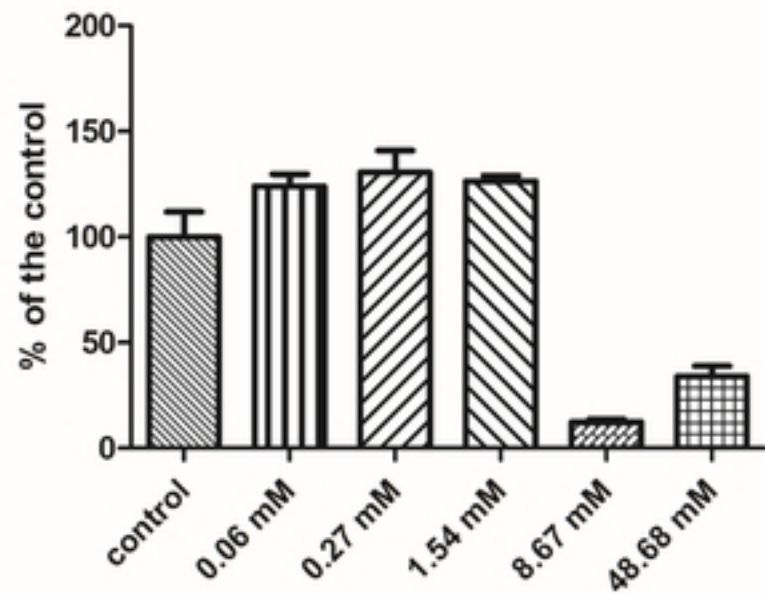

L-MTHF di choline

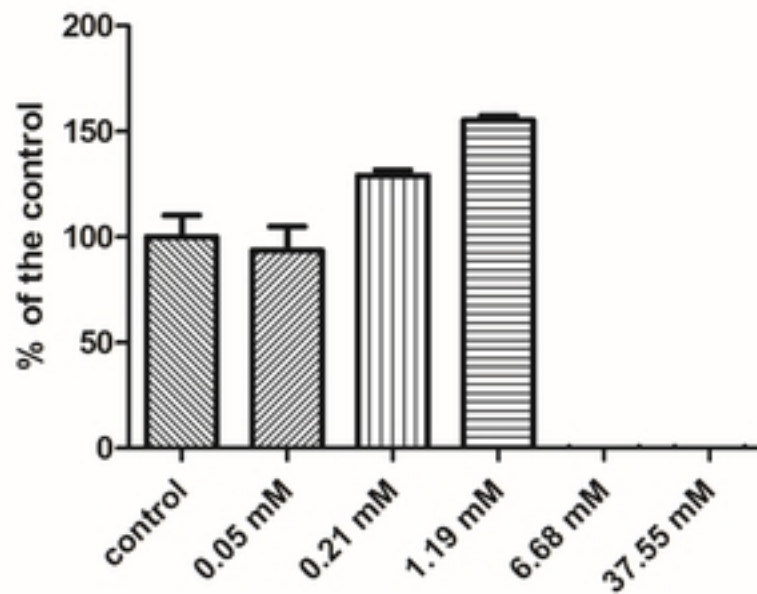

L-FTHF di arginine

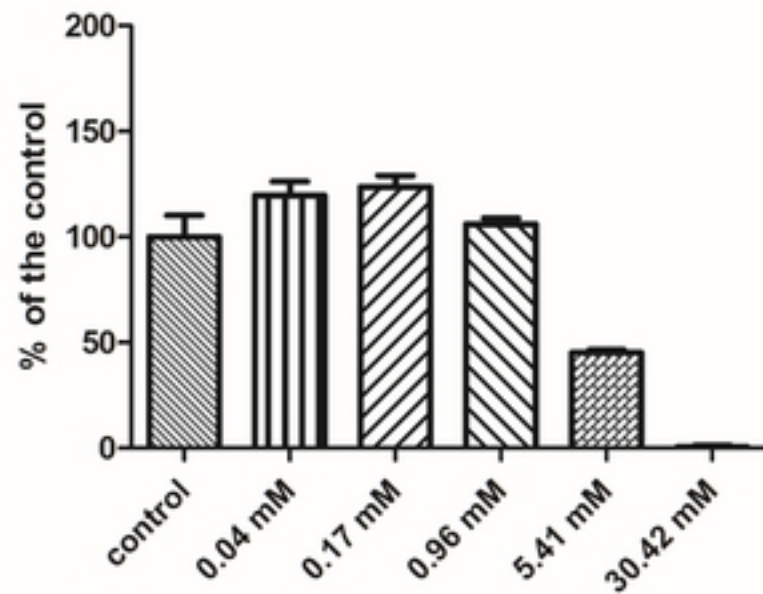

Figure6

L-FTHF Ca

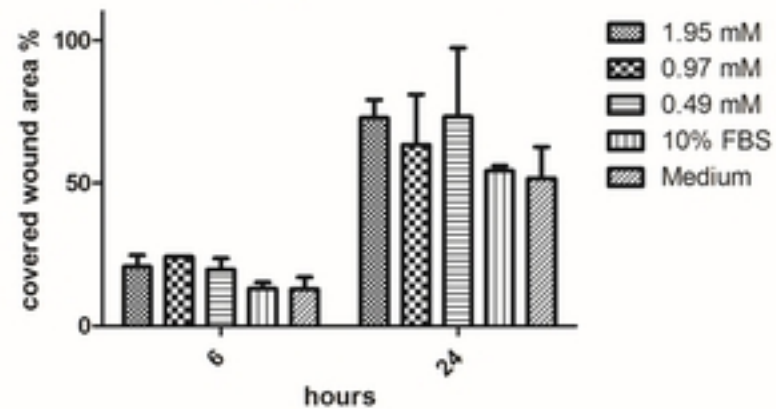

L-MTHF di choline

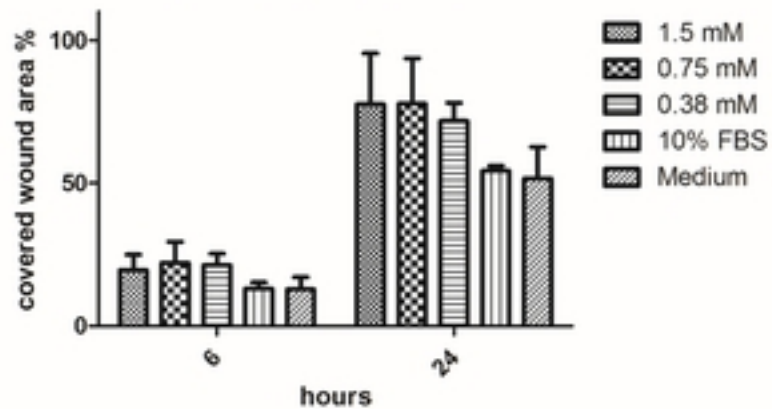

L-FTHF di arginine

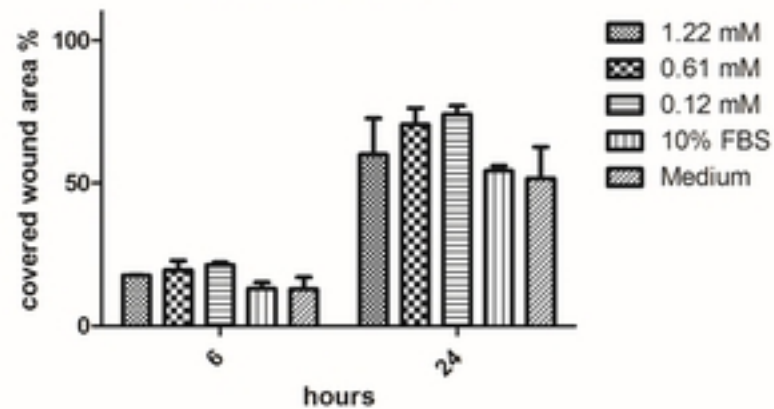

Figure 7



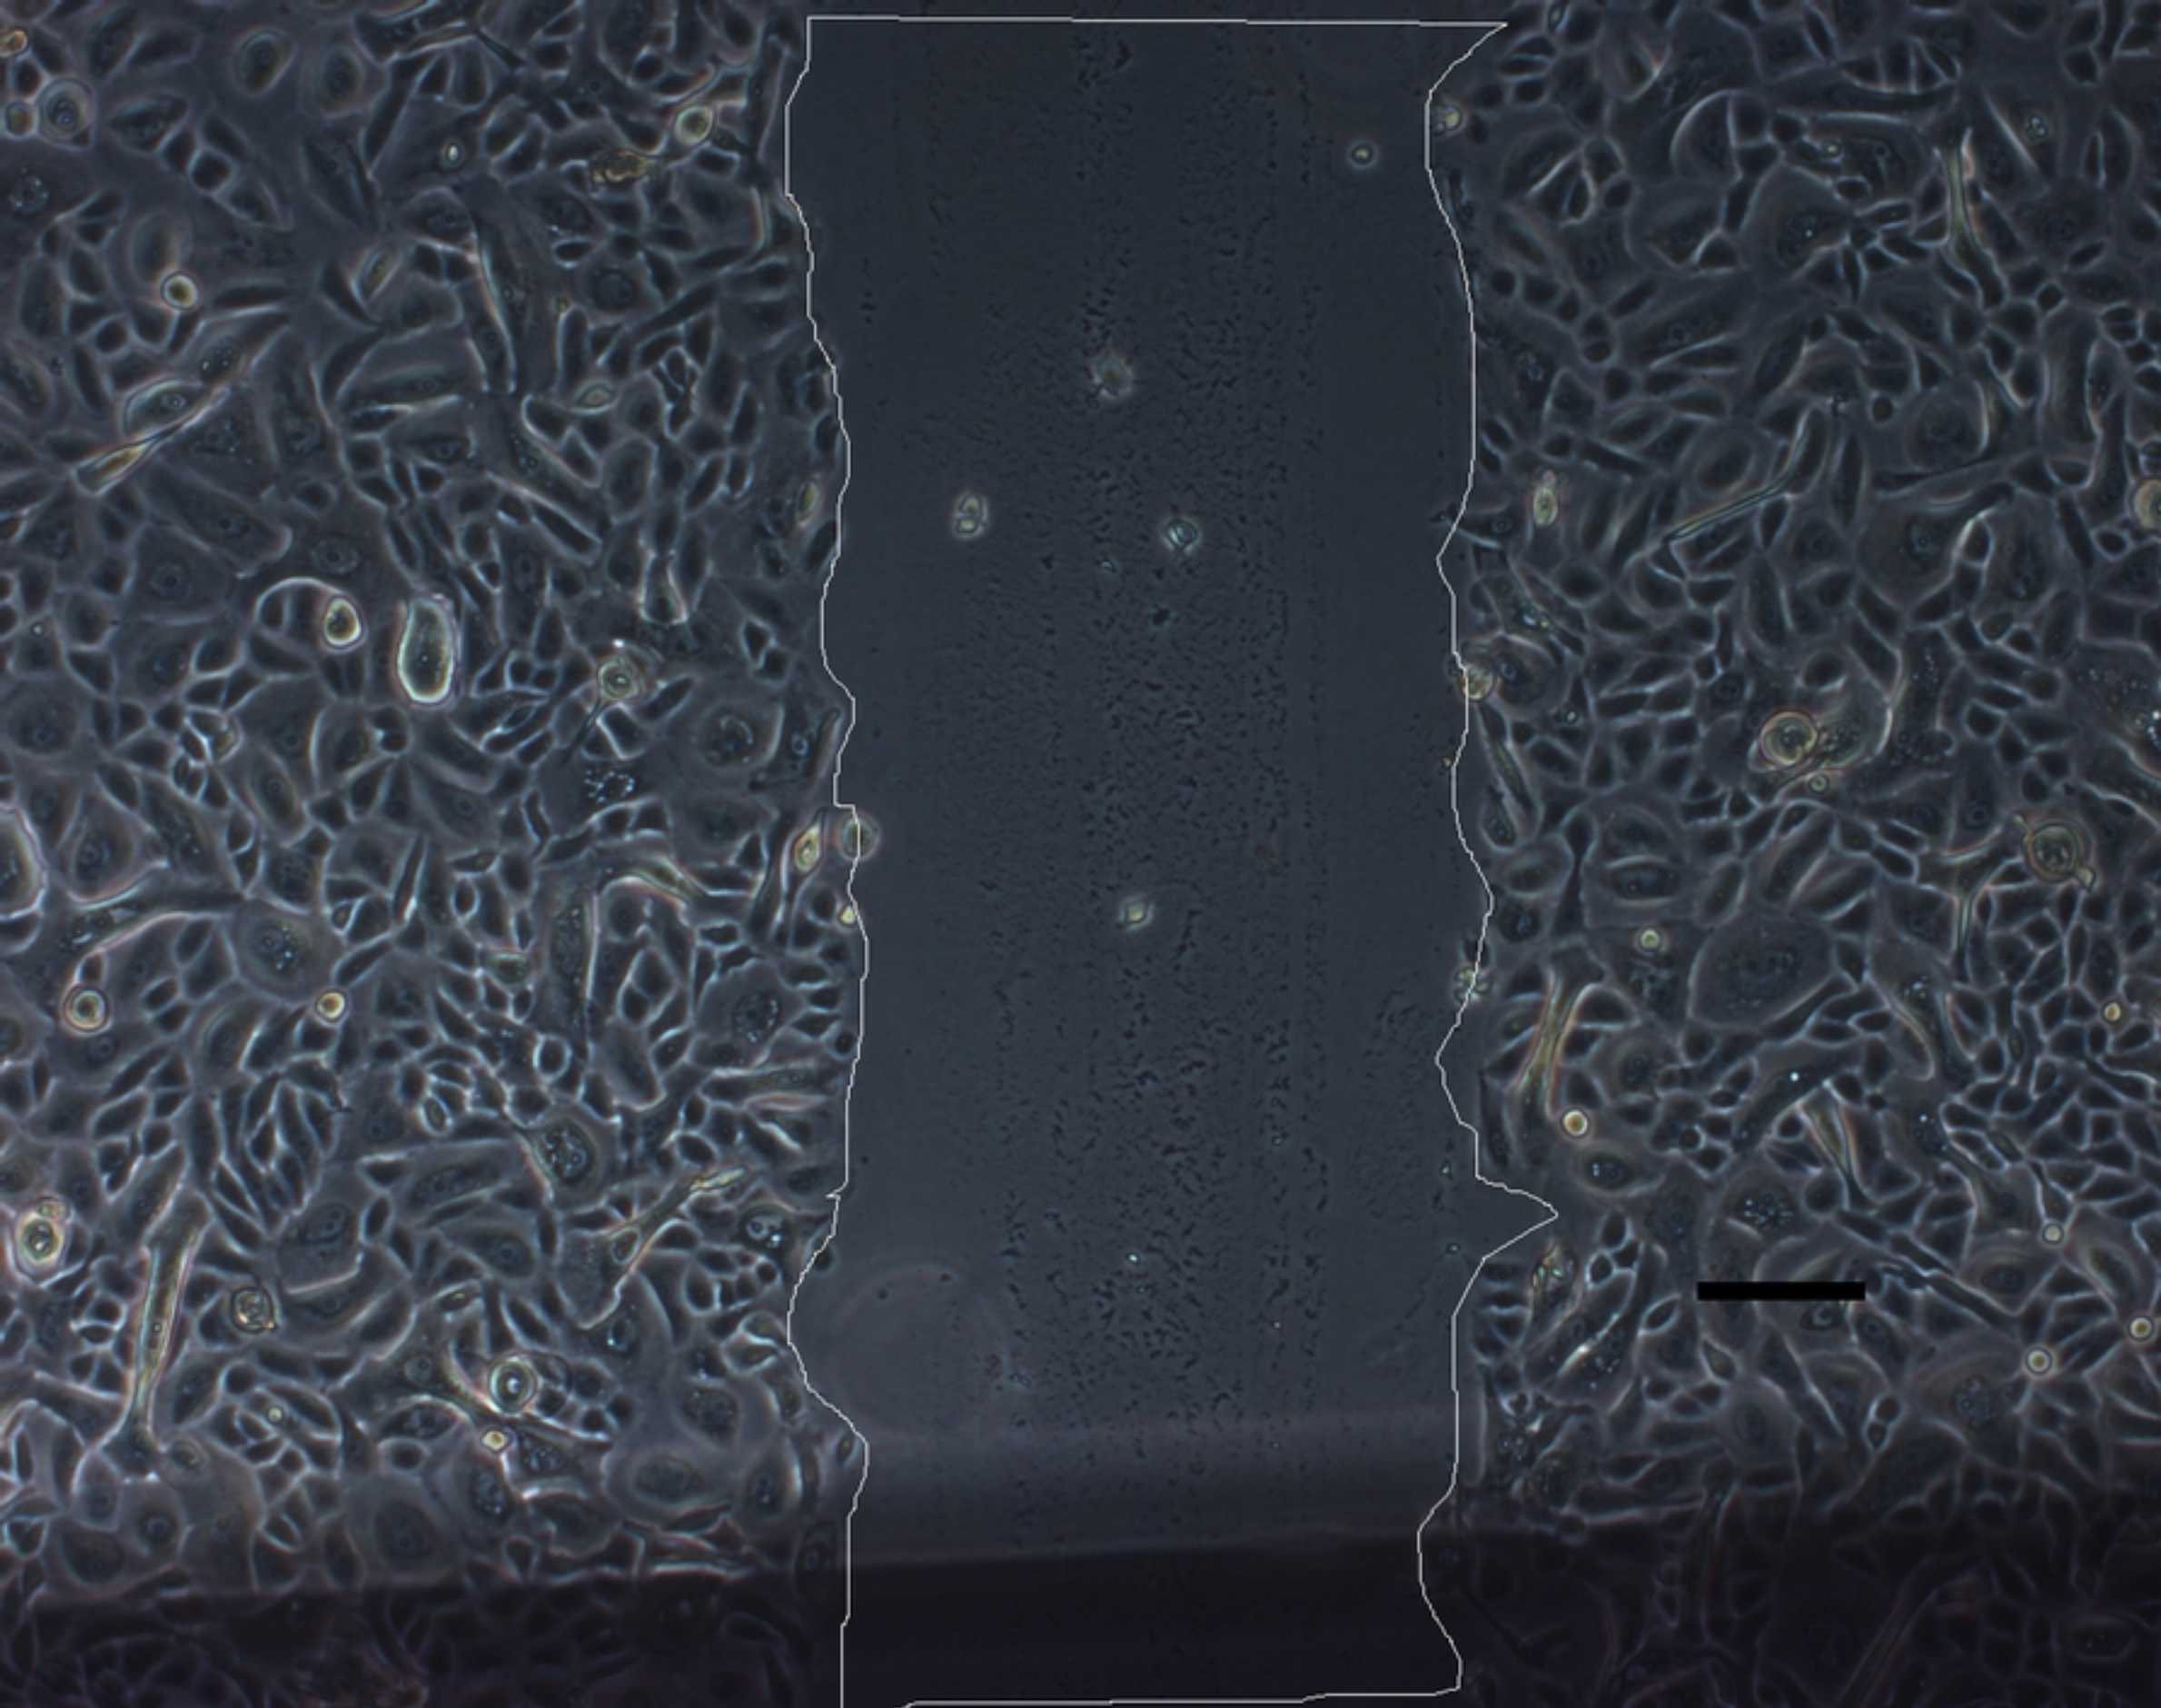

Figure8



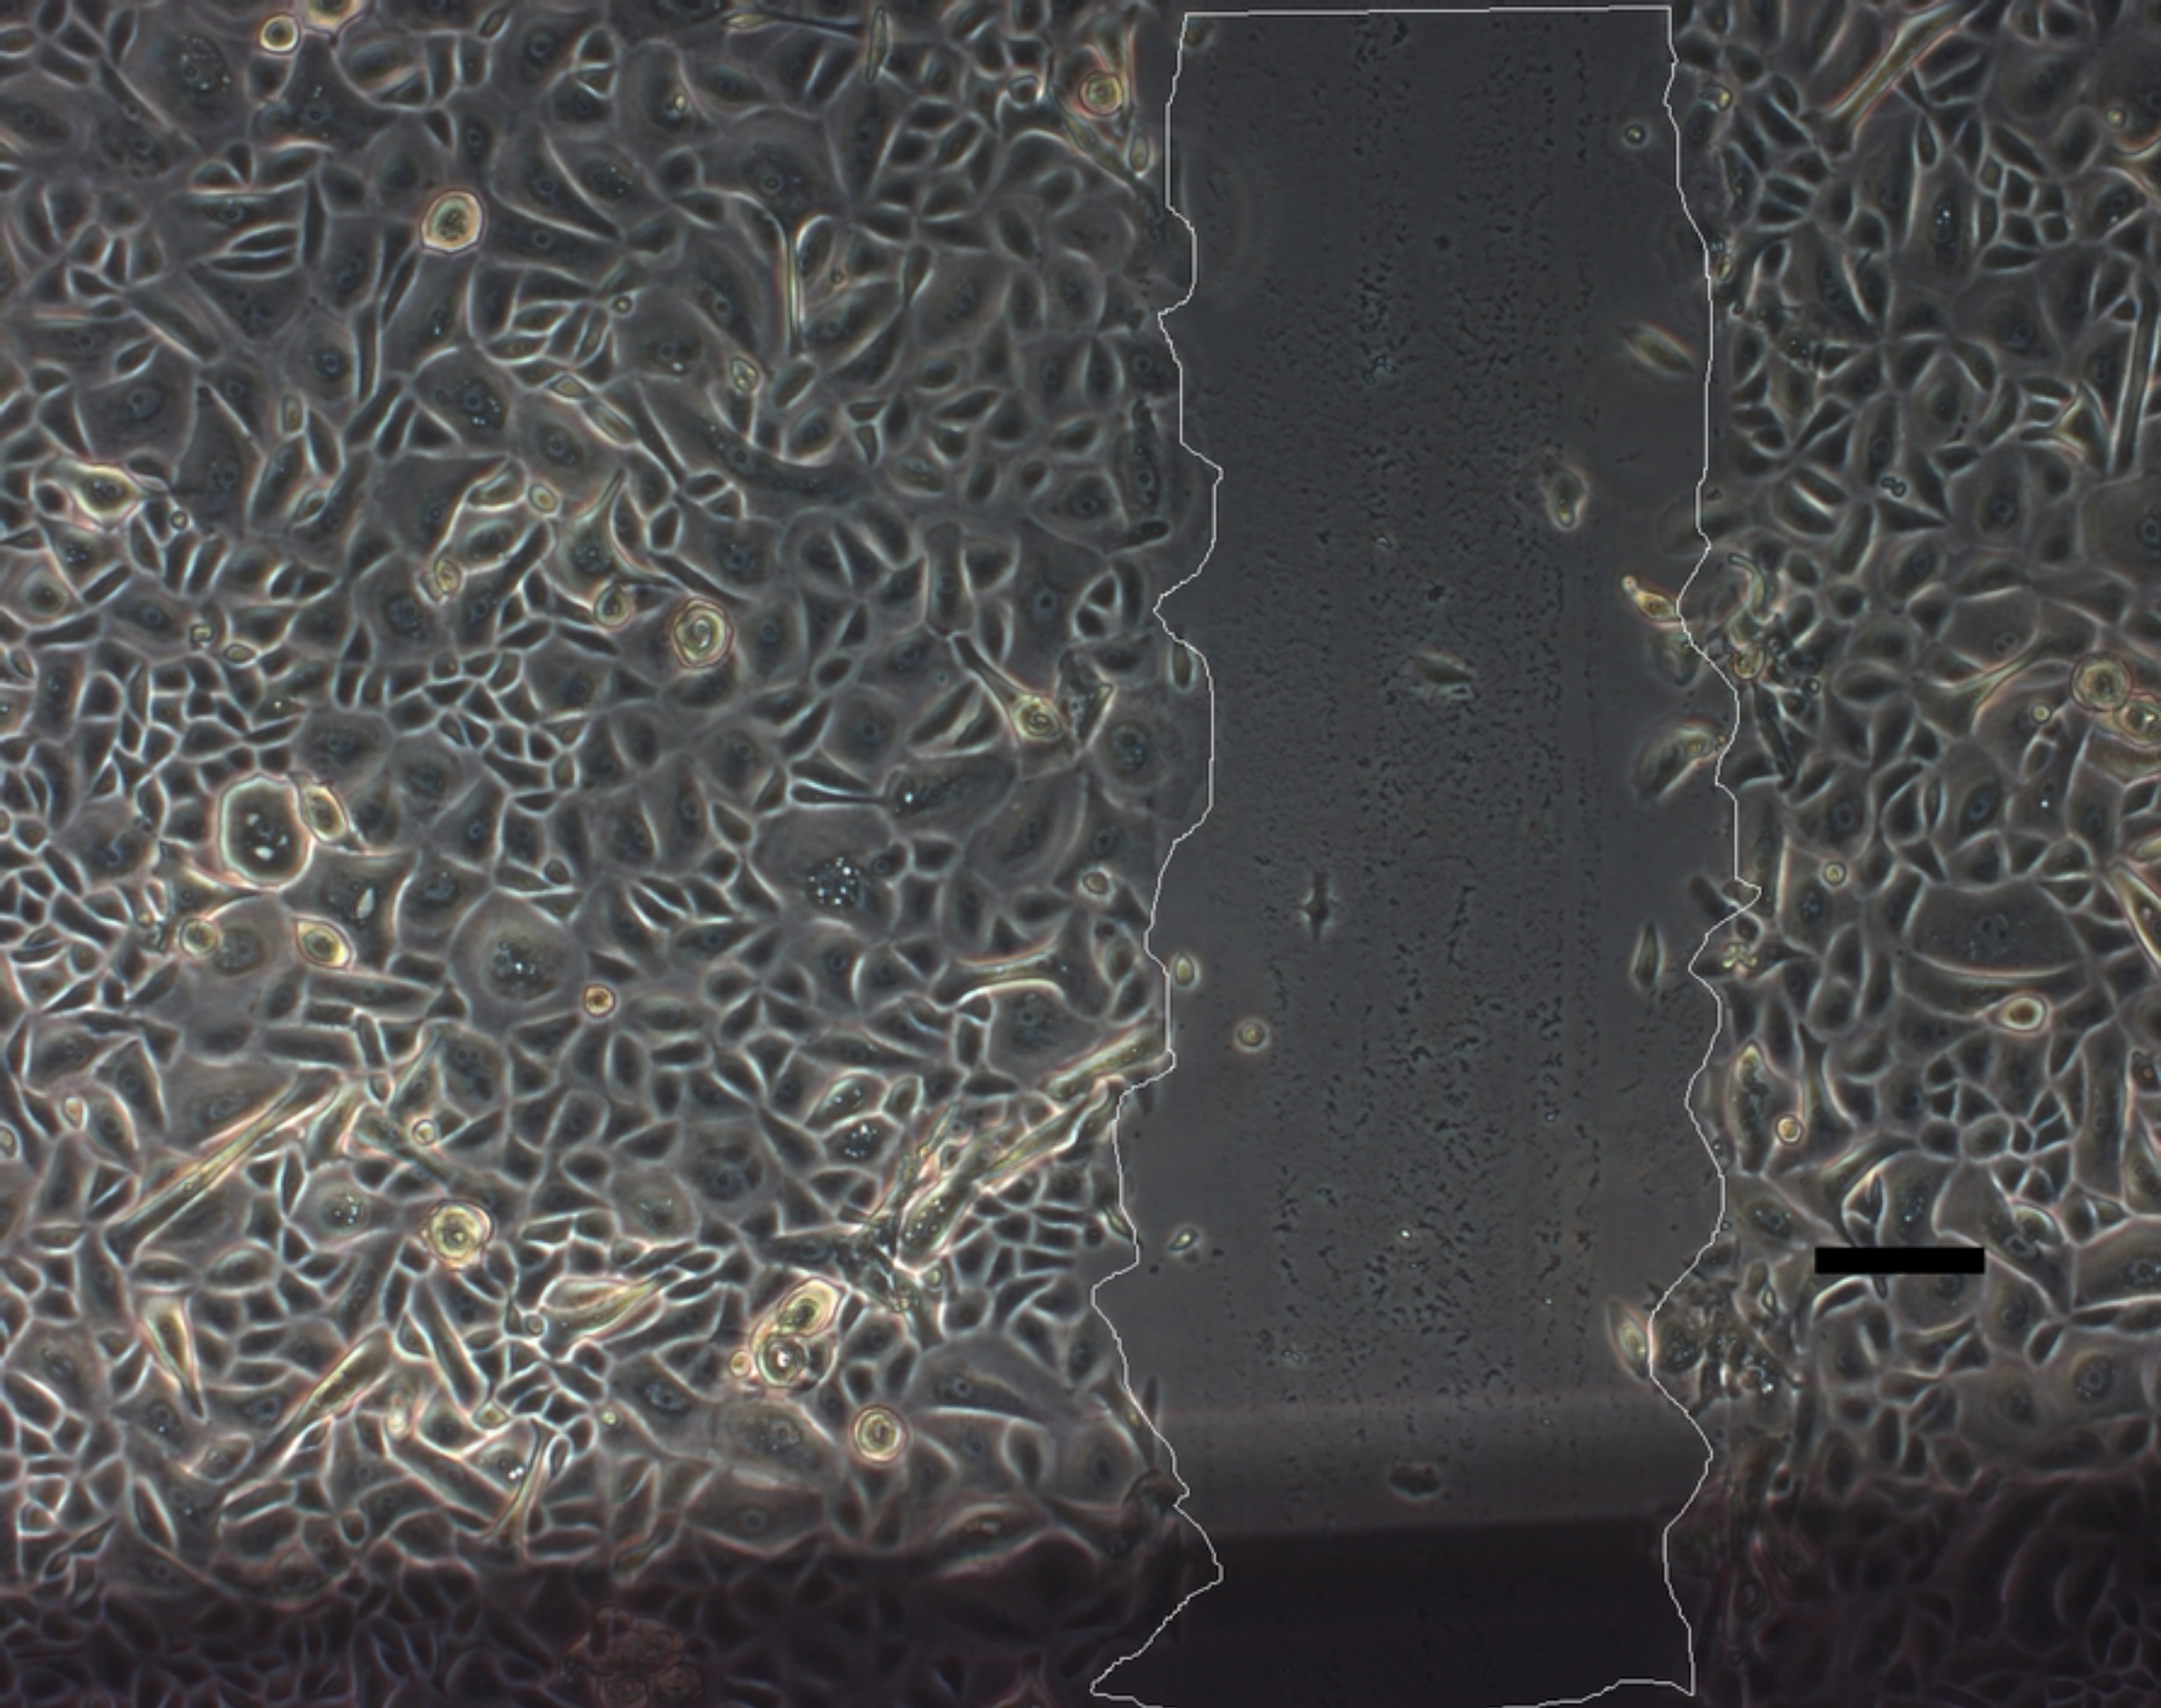

Figure9



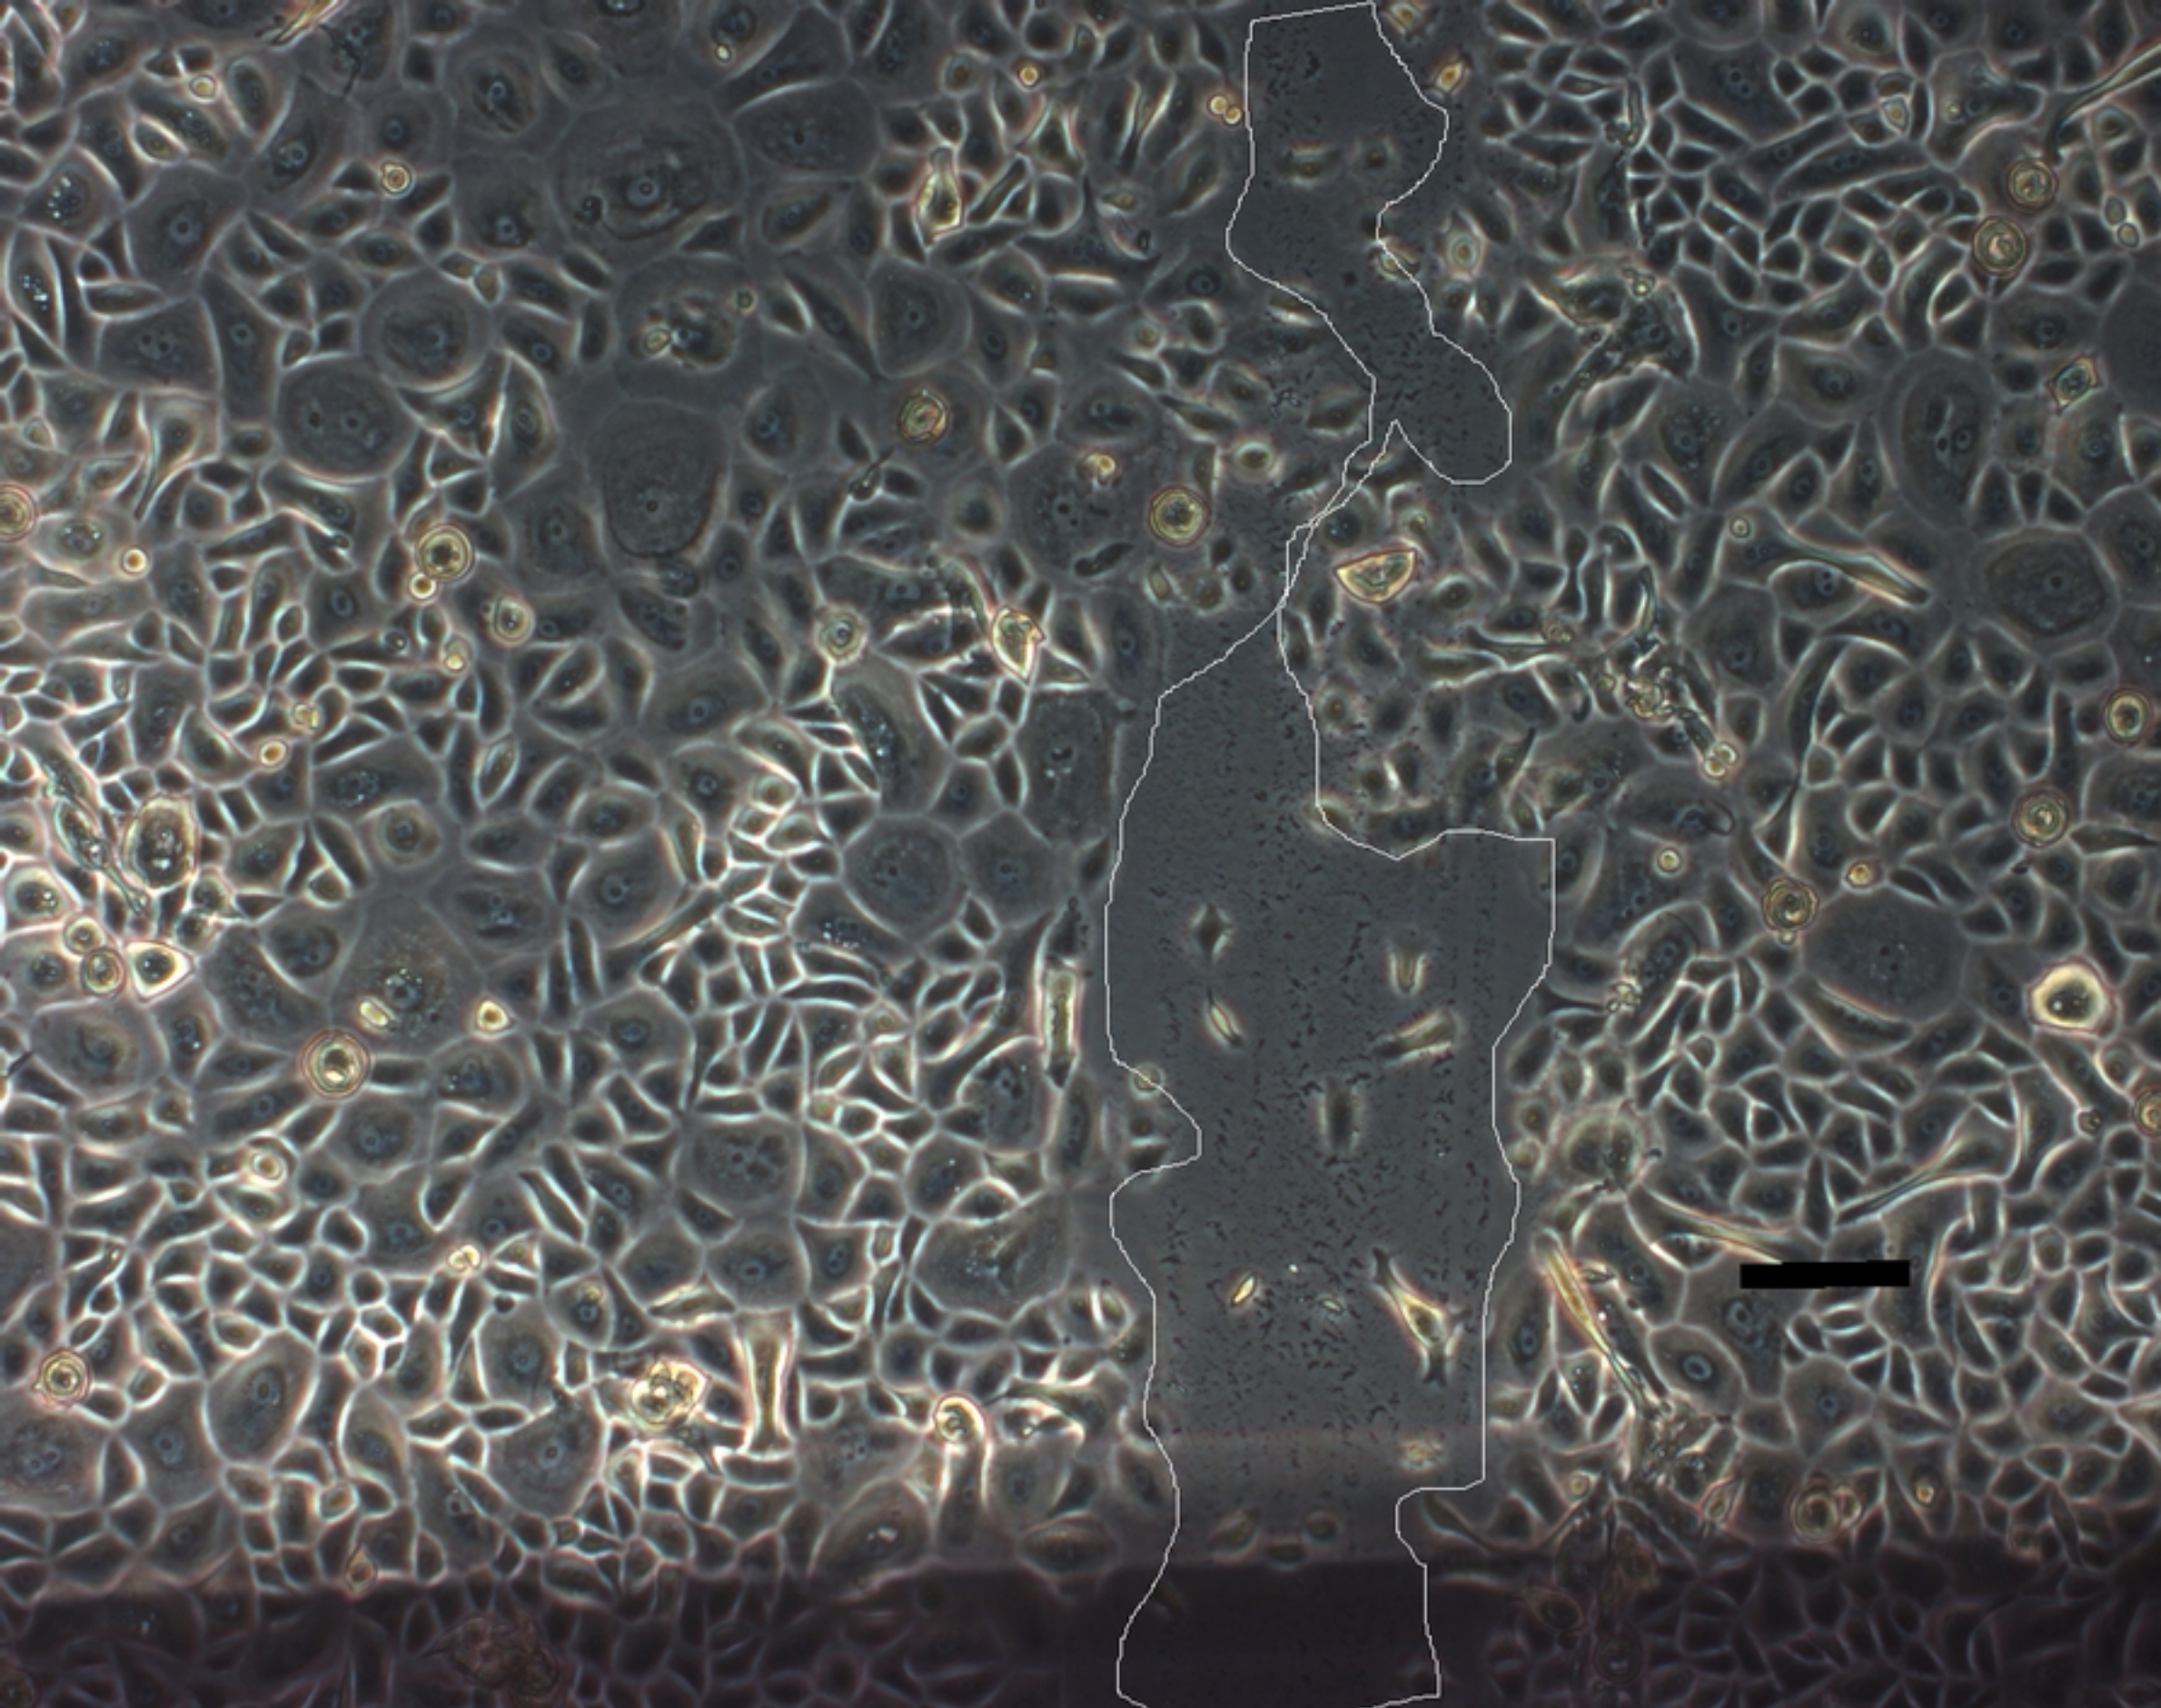

Figure 10
